# Supplementary material for: An overview of chemical constituents from Alpinia species in the last six decades
Source: Royal Society of Chemistry journal article supplement (doi:10.1039/c6ra27830b), 2017-01-01
Supplement: c6ra27830b1.pdf [file c6ra27830b1.pdf]

## Electronic Supplementary Information

### An Overview of Chemical Constituents from *Alpinia* species in the Last Six Decades

Xiao-Ni Ma,<sup>a,b</sup> Chun-Lan Xie,<sup>a,b</sup> Zi Miao,<sup>a,b</sup> Quan Yang,<sup>b</sup> and Xian-Wen Yang<sup>\*a</sup>

Table S1. A comparison of *Alpinia* species names from the references and the accepted name in The Plan List

| <i>Alpinia</i> species                                                   | The accepted name                                  |
|--------------------------------------------------------------------------|----------------------------------------------------|
| <i>Alpinia blepharocalyx</i> K. Schum.                                   | <i>Alpinia roxburghii</i> Sweet                    |
| <i>Alpinia bracteata</i> Roxb.                                           | <i>Alpinia roxburghii</i> Sweet                    |
| <i>Alpinia densespicata</i> Hayata ( <i>Alpinia densespicata</i> Hayata) | <i>Alpinia shimadae</i> Hayata                     |
| <i>Alpinia pahangensis</i> Ridley.                                       | <i>Alpinia pahangensis</i> Ridl.                   |
| <i>Alpinia flabellata</i> Ridley                                         | <i>Alpinia flabellata</i> Ridl.                    |
| <i>Alpinia formosana</i>                                                 | <i>Alpinia formosana</i> K.Schum.                  |
| <i>Alpinia katsumadai</i> Hayata ( <i>Alpinia katsumadae</i> Hayata)     | <i>Alpinia hainanensis</i> K.Schum                 |
| <i>Alpinia pinnanensis</i> T. L. Wu et Senjen                            | <i>Alpinia pinnanensis</i> T.L.Wu & S.J.Chen       |
| <i>Alpinia rafflesiana</i> Wall. ex. Bak.                                | <i>Alpinia rafflesiana</i> Wall. ex Baker          |
| <i>Alpinia speciosa</i> K. Schum.                                        | <i>Alpinia zerumbet</i> (Pers.) B.L.Burt & R.M.Sm. |
| <i>Alpinia sichuanensis</i> Z.Y.Zhu                                      | <i>A. jianganfeng</i> T.L.Wu                       |
| <i>Alpinia zerumbet</i> (Pers.) Burt & Smith                             | <i>Alpinia zerumbet</i> (Pers.) B.L.Burt & R.M.Sm. |

<sup>a</sup> Key Laboratory of Marine Biogenetic Resources; South China Sea Bio-Resource Exploitation and Utilization Collaborative Innovation Center; Third Institute of Oceanography, State Oceanic Administration, 184 Daxue Road, Xiamen 361005, PR China.

<sup>b</sup> Department of Traditional Chinese Medicine, Guangdong Pharmaceutical University, Guangzhou 510006, China.

Table S2. Chemical Constituents obtained from the genus of *Alpinia* over the last six decades since 1955.

| No.              | Compound class and name                                                                                           | Source                                     | Part                 | Ref               |
|------------------|-------------------------------------------------------------------------------------------------------------------|--------------------------------------------|----------------------|-------------------|
| Monoterpenoids   |                                                                                                                   |                                            |                      |                   |
| 1                | Rubraine                                                                                                          | <i>A. katsumadai</i>                       | Seeds                | 1                 |
| 2                | * Isorubraine                                                                                                     | <i>A. katsumadai</i>                       | Seeds                | 1                 |
| 3                | * Sumadain C                                                                                                      | <i>A. katsumadai</i>                       | Seeds                | 1                 |
| 4                | * Katsumadain                                                                                                     | <i>A. katsumadai</i>                       | Seeds                | 2                 |
| 5                | * ( <i>E</i> )-1-(1-Terpinen-4-yl)-3-methoxystilbene                                                              | <i>A. katsumadai</i>                       | Aerial parts         | 3                 |
| 6                | 2 $\alpha$ -Cinnamoyl cineole                                                                                     | <i>A. densibracteata</i>                   | Aerial parts         | 4                 |
| 7                | 2 $\beta$ -Cinnamoyl cineole                                                                                      | <i>A. densibracteata</i>                   | Aerial parts         | 4                 |
| 8                | * 2 $\alpha$ -( <i>p</i> -Hydroxycinnamoyl) cineole                                                               | <i>A. tonkinensis</i>                      | Rhizomes             | 5                 |
| 9                | * (1 <i>S</i> ,4 <i>R</i> ,6 <i>R</i> )-1,4-Epidioxy- <i>p</i> -menth-2-ene                                       | <i>A. densibracteata</i>                   | Aerial parts         | 4                 |
| 10               | (1 <i>R</i> ,4 <i>S</i> ,6 <i>R</i> )-1,4-Epidioxy- <i>p</i> -menth-2-ene                                         | <i>A. densibracteata</i>                   | Aerial parts         | 4                 |
| 11               | (3 <i>R</i> ,4 <i>R</i> ,6 <i>S</i> )-3,6-Dihydroxy-1-menthene                                                    | <i>A. sichuanensis</i>                     | Whole plant          | 6                 |
| 12               | 1-Terpinen-4-ol                                                                                                   | <i>A. katsumadai</i>                       | Aerial parts         | 3                 |
| 13               | * (1 <i>R</i> ,2 <i>R</i> )- <i>p</i> -Menth-3-ene-1,2-diol                                                       | <i>A. oxyphylla</i>                        | Fruits               | 7                 |
| 14               | 3,4-Dihydroxy- <i>p</i> -menth-1-ene                                                                              | <i>A. densibracteata</i>                   | Aerial parts         | 4                 |
| 15               | (1 <i>R</i> ,2 <i>R</i> ,4 <i>S</i> )- <i>trans</i> -2-Hydroxy-1,8-cineole<br>$\beta$ -D-glucopyranoside          | <i>A. galanga</i>                          | Rhizomes             | 8                 |
| 16               | (1 <i>S</i> ,2 <i>S</i> ,4 <i>R</i> )- <i>trans</i> -2-Hydroxy-1,8-cineole<br>$\beta$ -D-glucopyranoside          | <i>A. galanga</i>                          | Rhizomes             | 8                 |
| 17               | (1 <i>R</i> ,3 <i>S</i> ,4 <i>S</i> )- <i>trans</i> -3-Hydroxy-1,8-cineole<br>$\beta$ -D-glucopyranoside          | <i>A. galanga</i><br><i>A. officinarum</i> | Rhizomes<br>Rhizomes | 8<br>9            |
| Sesquiterpenoids |                                                                                                                   |                                            |                      |                   |
| 18               | <i>trans,trans</i> -Farnesol                                                                                      | <i>A. katsumadai</i>                       | Seeds                | 10,11             |
| 19               | Nerolidol                                                                                                         | <i>A. japonica</i>                         | Rhizomes             | 12                |
| 20               | * Oxyphyllols C                                                                                                   | <i>A. oxyphylla</i>                        | Fruits               | 13                |
| 21               | (11 <i>S</i> )-Nootkatone-11,12-diol                                                                              | <i>A. oxyphylla</i>                        | Fruits               | 14-16             |
| 22               | (11 <i>R</i> )-Nootkatone-11,12-diol                                                                              | <i>A. oxyphylla</i>                        | Fruits               | 15                |
| 23               | * 9-Hydroxy epinootkatol                                                                                          | <i>A. oxyphylla</i>                        | Fruits               | 17                |
| 24               | Eremophila-1(10),11(12)-dien-2,9-dione                                                                            | <i>A. oxyphylla</i>                        | Fruits               | 14,18             |
| 25               | 11-Hydroxyvalenc-1(10)-en-2-one                                                                                   | <i>A. oxyphylla</i>                        | Fruits               | 15,19,20          |
| 26               | * Oxyphyllol B                                                                                                    | <i>A. oxyphylla</i>                        | Fruits               | 13,15,19          |
| 27               | 13-Hydroxynootkatone                                                                                              | <i>A. oxyphylla</i>                        | Fruits               | 15,19,20          |
| 28               | Nootkatol                                                                                                         | <i>A. oxyphylla</i>                        | Fruits               | 15,21             |
| 29               | Epinootkatol                                                                                                      | <i>A. oxyphylla</i>                        | Fruits               | 15,22             |
| 30               | Nootkatone                                                                                                        | <i>A. oxyphylla</i>                        | Fruits               | 14,15,18,19,22,23 |
| 31               | 9 $\beta$ -Hydroxynootkatone                                                                                      | <i>A. oxyphylla</i>                        | Fruits               | 15,18             |
| 32               | * (11 <i>S</i> )-12-Chloronootkaton-11-ol                                                                         | <i>A. oxyphylla</i>                        | Fruits               | 18,23             |
| 33               | * (11 <i>R</i> )-12-Chloronootkaton-11-ol                                                                         | <i>A. oxyphylla</i>                        | Fruits               | 18,23             |
| 34               | (4 <i>R</i> *,5 <i>S</i> *,7 <i>R</i> *)-7-Acetyl-4,5-dimethyl-4,5,6,7,8,9-hexahydronaphthalen-2(3 <i>H</i> )-one | <i>A. oxyphylla</i>                        | Fruits               | 15,18,20          |
| 35               | * 12-Nornootkaton-6-en-11-one                                                                                     | <i>A. oxyphylla</i>                        | Fruits               | 18                |
| 36               | * Eremophilen-10 $\beta$ -ol                                                                                      | <i>A. intermedia</i>                       | Rhizomes             | 24                |

| No. | Compound class and name                                                                                                         | Source                 | part           | Ref.           |
|-----|---------------------------------------------------------------------------------------------------------------------------------|------------------------|----------------|----------------|
| 37  | Eremophilin-11-ol                                                                                                               | <i>A. japonica</i>     | Rhizomes       | 25             |
| 38  | Nootkatene                                                                                                                      | <i>A. oxyphylla</i>    | Fruits         | 18             |
| 39  | Valencene                                                                                                                       | <i>A. oxyphylla</i>    | Fruits         | 26             |
| 40  | Dehydro-nootkatone                                                                                                              | <i>A. oxyphylla</i>    | Seeds          | 27             |
| 41  | * Oxyphyllone A                                                                                                                 | <i>A. oxyphylla</i>    | Fruits         | 18,28          |
| 42  | * Oxyphyllone B                                                                                                                 | <i>A. oxyphylla</i>    | Fruits         | 28             |
| 43  | * Oxyphyllol D                                                                                                                  | <i>A. oxyphylla</i>    | Fruits         | 29             |
| 44  | * Oxyphyllol E                                                                                                                  | <i>A. oxyphylla</i>    | Fruits         | 18,29          |
| 45  | (4 $\alpha$ S*,7S*,8R*)-8-Hydroxy-1,4 $\alpha$ -dimethyl-7-(prop-1-en-2-yl)-4,4 $\alpha$ ,5,6,7,8-hexahydronaphthalen-2(3H)-one | <i>A. oxyphylla</i>    | Fruits         | 19             |
| 46  | * (10R)-13-Noreudesma-4,6-dien-3,11-dione                                                                                       | <i>A. oxyphylla</i>    | Fruits         | 14             |
| 47  | * (5S,8R,10R)-2-Oxoeadesma-3,7(11)-dien-12,8-olide                                                                              | <i>A. oxyphylla</i>    | Fruits         | 14             |
| 48  | 11 $\beta$ -Hydroxyl-3-oxo-4(5),6(7)-diene-eudesman-12-ol                                                                       | <i>A. oxyphylla</i>    | Fruits         | 16             |
| 49  | 11 $\alpha$ -Hydroxyl-3-oxo-4(5),6(7)-diene-eudesman-12-ol                                                                      | <i>A. oxyphylla</i>    | Fruits         | 16             |
| 50  | 7 $\alpha$ (H), 10 $\beta$ -Eudesm-4-en-3-one-11,12-diol                                                                        | <i>A. oxyphylla</i>    | Fruits         | 30             |
| 51  | Teucrone                                                                                                                        | <i>A. oxyphylla</i>    | Fruits         | 19,30          |
| 52  | (4 $\alpha$ S,7S,8R)-8-Hydroxy-1,4 $\alpha$ -dimethyl-7-(prop-1-en-2-yl)-4,4 $\alpha$ ,5,6,7,8-hexahydronaphthalen-2(3H)-one    | <i>A. oxyphylla</i>    | Fruits         | 30             |
| 53  | (4 $\alpha$ S,7S)-7-Hydroxy-1,4 $\alpha$ -dimethyl-7-(prop-1-en-2-yl)-4,4 $\alpha$ ,5,6,7,8-hexahydronaphthalen-2(3H)-one       | <i>A. oxyphylla</i>    | Fruits         | 19,20,30       |
| 54  | Ligucyperonol                                                                                                                   | <i>A. oxyphylla</i>    | Fruits         | 30             |
| 55  | ( $\pm$ )1 $\beta$ , 4 $\beta$ -Dihydroxyeudesman-11-ene                                                                        | <i>A. oxyphylla</i>    | Fruits         | 30             |
| 56  | Isocyperol                                                                                                                      | <i>A. oxyphylla</i>    | Fruits         | 13             |
| 57  | * Oxyphyllanene G                                                                                                               | <i>A. oxyphylla</i>    | Fruits         | 30             |
| 58  | 7- <i>epi</i> -Teucrone                                                                                                         | <i>A. oxyphylla</i>    | Fruits         | 14,18,19,23,30 |
| 59  | * Oxyphyllanene D                                                                                                               | <i>A. oxyphylla</i> .. | Fruits         | 30             |
| 60  | * Oxyphyllanene E                                                                                                               | <i>A. oxyphylla</i> .. | Fruits         | 30             |
| 61  | * Oxyphyllanene F                                                                                                               | <i>A. oxyphylla</i> .. | Fruits         | 14,30          |
| 62  | * Oxyphyllol A                                                                                                                  | <i>A. oxyphylla</i>    | Fruits         | 13             |
| 63  | Selin-11-en-4 $\alpha$ -ol                                                                                                      | <i>A. oxyphylla</i>    | Fruits         | 13             |
| 64  | Intermedeol                                                                                                                     | <i>A. intermedia</i>   | Rhizomes       | 24             |
| 65  | $\beta$ -Selinene                                                                                                               | <i>A. intermedia</i>   | Rhizomes       | 24             |
| 66  | 10- <i>epi</i> - $\gamma$ -Eudesmol                                                                                             | <i>A. japonica</i>     | Rhizomes       | 25             |
| 67  | * 10- <i>epi</i> -5 $\beta$ -Hydroperoxy- $\beta$ -eudesmol                                                                     | <i>A. japonica</i>     | Rhizomes       | 31             |
| 68  | * 10- <i>epi</i> -5 $\alpha$ -Hydroperoxy- $\beta$ -eudesmol                                                                    | <i>A. japonica</i>     | Rhizomes       | 31             |
| 69  | * 4,10- <i>epi</i> -5 $\beta$ -Hydroxydihydroeudesmol                                                                           | <i>A. japonica</i>     | Rhizomes       | 31             |
| 70  | 3 $\alpha$ ,4 $\alpha$ -Oxidoagarofuran                                                                                         | <i>A. japonica</i>     | Rhizomes,seeds | 25,32          |
| 71  | 3 $\beta$ ,4 $\beta$ -Oxidoagarofuran                                                                                           | <i>A. japonica</i>     | Rhizomes       | 25             |
| 72  | $\beta$ -Eudesmol                                                                                                               | <i>A. japonica</i>     | Rhizomes,seeds | 12,25,32       |
| 73  | 4-Hydroxy-dihydroagarofuran                                                                                                     | <i>A. japonica</i>     | Rhizomes,seeds | 12,25,32       |
| 74  | $\alpha$ -Agarofuran                                                                                                            | <i>A. japonica</i>     | Rhizomes,seeds | 25,32          |
| 75  | * Dihydroagarofuran                                                                                                             | <i>A. japonica</i>     | Rhizomes       | 25             |
| 76  | * Oxyphyllanene A                                                                                                               | <i>A. oxyphylla</i> .. | Fruits         | 30             |

| No. | Compound class and name                                                           | Source                | part     | Ref.                |
|-----|-----------------------------------------------------------------------------------|-----------------------|----------|---------------------|
| 77  | * Oxyphyllanene B                                                                 | <i>A. oxyphylla</i> . | Fruits   | 18,30               |
| 78  | (4 <i>S</i> *,5 <i>E</i> ,10 <i>R</i> *)-7-Oxo-tri-nor-eudesm-5-en-4 <i>β</i> -ol | <i>A. oxyphylla</i>   | Fruits   | 19,20               |
| 79  | Teuhetenone A                                                                     | <i>A. oxyphylla</i> . | Fruits   | 19,20,30            |
| 80  | * Oxyphyllenone A                                                                 | <i>A. oxyphylla</i> . | Fruits   | 13,14,30,33         |
| 81  | * Oxyphyllenone B                                                                 | <i>A. oxyphylla</i> . | Fruits   | 13,14,33            |
| 82  | Oxyphyllanene C                                                                   | <i>A. oxyphylla</i> . | Fruits   | 30                  |
| 83  | * (5 <i>R</i> ,7 <i>S</i> ,10 <i>S</i> )-5-Hydroxy-13-noreudesma-3-en-2,11-dione  | <i>A. oxyphylla</i>   | Fruits   | 14                  |
| 84  | * 4-Methoxy-oxyphyllenone A                                                       | <i>A. oxyphylla</i>   | Fruits   | 19                  |
| 85  | * Oxyphenol A                                                                     | <i>A. oxyphylla</i>   | Fruits   | 16                  |
| 86  | Mustakone                                                                         | <i>A. oxyphylla</i>   | Fruits   | 18                  |
| 87  | * Oxyphyllendiol A                                                                | <i>A. oxyphylla</i>   | Fruits   | 13,14,18,23,33      |
| 88  | * Oxyphyllendiol B                                                                | <i>A. oxyphylla</i>   | Fruits   | 7,13,14,18,19,23,33 |
| 89  | * Oxyphyllone G                                                                   | <i>A. oxyphylla</i>   | Fruits   | 14,29               |
| 90  | (4 <i>S</i> )-10-Nor-calamenen-10-one                                             | <i>A. oxyphylla</i>   | Fruits   | 14                  |
| 91  | * Oxyphyllone C                                                                   | <i>A. oxyphylla</i>   | Fruits   | 7                   |
| 92  | * Oxyphyllone D                                                                   | <i>A. oxyphylla</i>   | Fruits   | 7,18                |
| 93  | * Oxyphyllone E                                                                   | <i>A. oxyphylla</i>   | Fruits   | 18,20,34            |
| 94  | * Oxyphyllenotriol A                                                              | <i>A. oxyphylla</i>   | Fruits   | 29                  |
| 95  | * 2 <i>β</i> -Hydroxy- <i>δ</i> -cadinol                                          | <i>A. oxyphylla</i>   | Fruits   | 18                  |
| 96  | * (-)-(1 <i>R</i> ,4 <i>S</i> )-8-Hydroxy-13-calamenenoic acid                    | <i>A. oxymitra</i>    | Rhizomes | 35                  |
| 97  | * Alpiniaterpene A                                                                | <i>A. officinarum</i> | Rhizomes | 36                  |
| 98  | 4(15)-Cadinene-6,10-diol                                                          | <i>A. tonkinensis</i> | Rhizomes | 5                   |
| 99  | * 2-Methyl-6-isopropyl-7-hydroxymethyl naphthalene                                | <i>A. oxyphylla</i>   | Fruits   | 20                  |
| 100 | * <i>epi</i> -Oxyphyllenone                                                       | <i>A. oxyphylla</i>   | Fruits   | 20                  |
| 101 | * Alpinenone                                                                      | <i>A. japonica</i>    | Rhizomes | 18,23,37            |
|     |                                                                                   | <i>A. intermedia</i>  | Rhizomes | 24                  |
| 102 | Hanamyol                                                                          | <i>A. japonica</i>    | Rhizomes | 38                  |
| 103 | * Hanalpinol peroxide                                                             | <i>A. intermedia</i>  | Rhizomes | 24                  |
| 104 | * Isohanalpinol                                                                   | <i>A. intermedia</i>  | Rhizomes | 24                  |
| 105 | * Aokumanol                                                                       | <i>A. intermedia</i>  | Rhizomes | 24                  |
| 106 | * Hanalpinol                                                                      | <i>A. intermedia</i>  | Rhizomes | 24                  |
|     |                                                                                   | <i>A. japonica</i>    | Rhizomes | 39                  |
| 107 | * Hanalpinone                                                                     | <i>A. intermedia</i>  | Rhizomes | 24                  |
|     |                                                                                   | <i>A. japonica</i>    | Rhizomes | 37                  |
| 108 | * Isohanalpinone                                                                  | <i>A. intermedia</i>  | Rhizomes | 24                  |
|     |                                                                                   | <i>A. japonica</i>    | Rhizomes | 37                  |
| 109 | Europelargone B                                                                   | <i>A. formossana</i>  | Rhizomes | 40                  |
|     |                                                                                   | <i>A. intermedia</i>  |          | 24                  |
|     |                                                                                   | <i>A. japonica</i>    | Rhizomes | 38,39               |
| 110 | Europelargone A                                                                   | <i>A. intermedia</i>  |          | 24                  |
|     |                                                                                   | <i>A. japonica</i>    | Rhizomes | 38,39               |
| 111 | * Epialpinolide                                                                   | <i>A. intermedia</i>  |          | 24                  |
| 112 | * Alpinolide peroxide                                                             | <i>A. japonica</i>    | Rhizomes | 37                  |

| No. | Compound class and name                                                                                           | Source                   | part         | Ref.  |
|-----|-------------------------------------------------------------------------------------------------------------------|--------------------------|--------------|-------|
| 113 | * 6-Hydroxy-alpinolide                                                                                            | <i>A. japonica</i>       | Rhizomes     | 37    |
| 114 | Alpinolide                                                                                                        | <i>A. japonica</i>       | Rhizomes     | 38    |
| 115 | * (+)-Mandassidion                                                                                                | <i>A. oxyphylla</i>      | Fruits       | 7     |
| 116 | * Mandassion A                                                                                                    | <i>A. oxyphylla</i>      | Fruits       | 16    |
| 117 | * Mandassion B                                                                                                    | <i>A. oxyphylla</i>      | Fruits       | 16    |
| 118 | Caryophyllene oxide                                                                                               | <i>A. galanal</i>        | Seeds        | 41    |
|     |                                                                                                                   | <i>A. conchigera</i>     | Rhizomes     | 42    |
| 119 | Caryophyllenol-I                                                                                                  | <i>A. galanal</i>        | Seeds        | 41    |
| 120 | Caryophyllenol-II                                                                                                 | <i>A. galanal</i>        | Seeds        | 41    |
| 121 | (1 <i>S</i> ,4 <i>R</i> ,6 <i>R</i> )-1,4-Epidioxy-bisabola-2,10-diene                                            | <i>A. densibracteata</i> | Aerial parts | 4     |
| 122 | (1 <i>R</i> ,4 <i>S</i> ,6 <i>R</i> )-1,4-Epidioxy-bisabola-2,10-diene                                            | <i>A. densibracteata</i> | Aerial parts | 4     |
| 123 | 3-Hydroxy,11-hydroperoxy-bisabola-1,9-diene                                                                       | <i>A. densibracteata</i> | Aerial parts | 4     |
| 124 | 3-Hydroxy-10-hydroperoxy-bisabola-1,10-diene                                                                      | <i>A. densibracteata</i> | Aerial parts | 4     |
| 125 | 4-Hydroxy-11-hydroperoxy-bisabola-1,3(15),9-triene                                                                | <i>A. densibracteata</i> | Aerial parts | 4     |
| 126 | 3,4-Dihydroxy-bisabola-1,10-diene                                                                                 | <i>A. densibracteata</i> | Aerial parts | 4     |
| 127 | * 3,4-Seco-biasbol-10-ene-3-one-1,4-olide                                                                         | <i>A. japonica</i>       | Rhizomes     | 43    |
| 128 | * (1 <i>S</i> ,6 <i>S</i> )-1 $\alpha$ ,10-dihydroxy-biasbol-2,11-dienes-4-one                                    | <i>A. japonica</i>       | Rhizomes     | 43    |
| 129 | * (1 <i>S</i> ,6 <i>S</i> )-1 $\alpha$ -Hydroxy-biasbol-2,10-diene-14-al                                          | <i>A. japonica</i>       | Rhizomes     | 43    |
| 130 | 8-Hydroxy-biasbol-2,10-dienes-4-one                                                                               | <i>A. japonica</i>       | Rhizomes     | 43    |
| 131 | 16-Hydroxy-biasbol-2,10-dienes-4-one                                                                              | <i>A. japonica</i>       | Rhizomes     | 43    |
| 132 | 1 $\alpha$ -Hydroxy-biasbol-2,10-dienes-4-one                                                                     | <i>A. japonica</i>       | Rhizomes     | 43    |
| 133 | 4 $\theta$ -Hydroxy-biasbol-2,10-dienes-1-one                                                                     | <i>A. japonica</i>       | Rhizomes     | 43    |
| 134 | 4 $\alpha$ -hydroxybisabol-1-one                                                                                  | <i>A. japonica</i>       | Rhizomes     | 44    |
| 135 | ar-Curcumen-15-ol                                                                                                 | <i>A. japonica</i>       | Rhizomes     | 43    |
| 136 | Xanthorrhizol                                                                                                     | <i>A. japonica</i>       | Rhizomes     | 43    |
| 137 | * (1 <i>R</i> ,4 <i>R</i> ,6 <i>S</i> ,7 <i>S</i> ,9 <i>S</i> )-4 $\alpha$ -hydroxy-1,9-peroxybisabola-2,10-diene | <i>A. japonica</i>       | Rhizomes     | 44    |
| 138 | 3(12),7(13),9( <i>E</i> )-Humulatriene-2,6-diol                                                                   | <i>A. oxyphylla</i>      | Fruits       | 45    |
| 139 | Humulene epoxide II                                                                                               | <i>A. formossana</i>     | Rhizomes     | 40    |
|     |                                                                                                                   | <i>A. japonica</i>       | Rhizomes     | 12    |
| 140 | (9 <i>E</i> )-Humulene-2,3,6,7-diepoxyde                                                                          | <i>A. oxyphylla</i>      | Fruits       | 18,45 |
| 141 | $\gamma$ -Bicyclohomofarnesal                                                                                     | <i>A. calcarata</i>      | Rhizomes     | 46    |
| 142 | Shyobunone                                                                                                        | <i>A. calcarata</i>      | Rhizomes     | 46    |
| 143 | Pubescone                                                                                                         | <i>A. oxyphylla</i>      | Fruits       | 18    |
| 144 | (-)-Oplopanone                                                                                                    | <i>A. oxyphylla</i>      | Fruits       | 45    |
| 145 | * Oxyphyllone F tetra-norsesquiterpene                                                                            | <i>A. oxyphylla</i>      | Fruits       | 34    |
| 146 | * (Z)-4-(2,6-Dimethylhepta-1,5-dien-1-yl)-1-methyl-cyclobut-1-ene norsesquiterpene                                | <i>A. japonica</i>       | Rhizomes     | 43    |
| 147 | Caryolane-1,9 $\beta$ -diol                                                                                       | <i>A. galanga</i>        | Seeds        | 47    |
| 148 | Alpiniol                                                                                                          | <i>A. japonica</i>       | Rhizomes     | 48    |
| 149 | 2-Methyl-6-isopropyl-7-hydroxymethyl naphthalene                                                                  | <i>A. oxyphylla</i>      | Fruits       | 20    |

| No.                 | Compound class and name | Source                                            | part            | Ref.  |
|---------------------|-------------------------|---------------------------------------------------|-----------------|-------|
| <b>Diterpenoids</b> |                         |                                                   |                 |       |
| 150                 | *                       | (E)-Labda-8(17),12-diene-15,16-dial               |                 |       |
|                     |                         | <i>A. nigra</i>                                   | Seeds           | 49,50 |
|                     |                         | <i>A. pahangensis</i>                             | Rhizome         | 51    |
|                     |                         | <i>A. oxyphylla</i>                               | Fruits          | 13    |
|                     |                         | <i>A. galanga</i>                                 | Seeds,Rhizomes  | 52,53 |
|                     |                         | <i>A. speciosa</i>                                | Seeds           | 54    |
|                     |                         | <i>A. katsumadai</i>                              | Aerial part     | 3     |
|                     |                         | <i>A. malaccensis</i>                             | Rhizomes        | 55    |
|                     |                         | <i>A. chinensis</i>                               | Flowers         | 56    |
|                     |                         | <i>A. zerumbet</i>                                | Rhizomes,leaves | 57-59 |
| 151                 |                         | (E)-8 $\beta$ ,17-Epoxyabd-12-ene-15,16-dial      |                 |       |
|                     |                         | <i>A. nigra</i>                                   | Seeds           | 49,50 |
|                     |                         | <i>A. galanga</i>                                 | Roots,Seeds     | 52,60 |
|                     |                         | <i>A. katsumadai</i>                              | Aerial parts    | 3     |
| 152                 | *                       | (E)-Labda-8(17),12-diene-15-ol-16-al              |                 |       |
|                     |                         | <i>A. formosana</i>                               | Rhizomes        | 40    |
|                     |                         | <i>A. calcarata</i>                               | Rhizomes        | 46    |
|                     |                         | <i>A. pahangensis</i>                             | Rhizomes        | 51    |
| 153                 |                         | (E)-Labda-8(17),13-dien-15-al                     |                 |       |
|                     |                         | <i>A. pahangensis</i>                             | Rhizomes        | 51    |
| 154                 | *                       | (E)-14 $\xi$ ,15-Epoxyabd-8(17),12-dien-16-al     |                 |       |
|                     |                         | <i>A. chinensis</i>                               | Flowers         | 56    |
| 155                 | *                       | (E,E)-15-Hydroxyabd-8(17),11,13-trien-16-al       |                 |       |
|                     |                         | <i>A. chinensis</i>                               | Flowers         | 56    |
| 156                 | *                       | (E)-14 $\xi$ ,15-Dihydroxyabd-8(17),12-dien-16-al |                 |       |
|                     |                         | <i>A. chinensis</i>                               | Flowers         | 56    |
| 157                 | *                       | (E)-12 $\xi$ ,15-Dihydroxyabd-8(17)-13-dien-16-al |                 |       |
|                     |                         | <i>A. chinensis</i>                               | Flowers         | 56    |
| 158                 | *                       | (E)-12 $\xi$ ,15-Dihydroxyabd-8(17)-13-dien-16-al |                 |       |
|                     |                         | <i>A. chinensis</i>                               | Flowers         | 56    |
| 159                 | *                       | (E)-14,15,16-Trinorabd-8(17),11-dien-13-al        |                 |       |
|                     |                         | <i>A. pahangensis</i>                             | Rhizomes        | 51    |
| 160                 | *                       | (E)-14,15,16-Trinorabd-8(17),11-dien-13-one       |                 |       |
|                     |                         | <i>A. pahangensis</i>                             | Rhizomes        | 51    |
|                     |                         | <i>A. speciosa</i>                                | Seeds           | 54    |
|                     |                         | <i>A. zerumbet</i>                                | Seeds           | 61    |
|                     |                         | <i>A. formosana</i>                               | Rhizomes        | 40    |
|                     |                         | <i>A. calcarata</i>                               | Rhizomes        | 46    |
| 161                 |                         | (E)-14,15,16-Trinorabd-8(17),11-dien-13-oic acid  |                 |       |
|                     |                         | <i>A. pahangensis</i>                             | Rhizomes        | 51    |
| 162                 | *                       | (E)-15-nor-16-Oxo-8(17),12-labdadiene             |                 |       |
|                     |                         | <i>A. tonkinensis</i>                             | Rhizomes        | 5     |
| 163                 | *                       | Zerumin B                                         |                 |       |
|                     |                         | <i>A. zerumbet</i>                                | Seeds           | 61    |
|                     |                         | <i>A. pahangensis</i>                             | Rhizomes        | 49    |
| 164                 | *                       | (E)-15,16-Epoxyabd-8(17),11,13-trien-16-ol        |                 |       |
|                     |                         | <i>A. chinensis</i>                               | Flowers         | 56    |
| 165                 | *                       | (E)-15-Hydroxyabd-8(17),11,13-trien-16,15-olide   |                 |       |
|                     |                         | <i>A. chinensis</i>                               | Flowers         | 56    |
| 166                 | *                       | Calcaratarin A                                    |                 |       |
|                     |                         | <i>A. calcarata</i>                               | Rhizomes        | 46    |
|                     |                         | <i>A. pahangensis</i>                             | Rhizomes        | 51    |
| 167                 | *                       | Calcaratarin B                                    |                 |       |
|                     |                         | <i>A. calcarata</i>                               | Rhizomes        | 46    |
| 168                 | *                       | Calcaratarin C                                    |                 |       |
|                     |                         | <i>A. calcarata</i>                               | Rhizomes        | 46    |
| 169                 | *                       | Calcaratarin D                                    |                 |       |
|                     |                         | <i>A. calcarata</i>                               | Rhizomes        | 46    |
| 170                 |                         | Labda-8(17),11,13-trien-15(16)-olide              |                 |       |
|                     |                         | <i>A. calcarata</i>                               | Rhizomes        | 46    |
| 171                 |                         | Coronar in A                                      |                 |       |
|                     |                         | <i>A. malaccensis</i>                             | Rhizomes        | 55    |

| No.   | Compound class and name                                                                                            | Source                 | part         | Ref.  |
|-------|--------------------------------------------------------------------------------------------------------------------|------------------------|--------------|-------|
| 172   | Coronararin E                                                                                                      | <i>A. malaccensis</i>  | Rhizomes     | 55    |
|       |                                                                                                                    | <i>A. zerumbet</i>     | Seeds        | 61    |
|       |                                                                                                                    | <i>A. chinensis</i>    | Flowers      | 56    |
| 173   | Hedyforrestin B                                                                                                    | <i>A. malaccensis</i>  | Rhizomes     | 55    |
| 174 * | Zerumin A                                                                                                          | <i>A. zerumbet</i>     | Seeds        | 61    |
|       |                                                                                                                    | <i>A. calcarata</i>    | Rhizomes     | 46    |
|       |                                                                                                                    | <i>A. pahangensis</i>  | Rhizomes     | 51    |
| 175 * | Pahangensin B                                                                                                      | <i>A. pahangensis</i>  | Rhizomes     | 62    |
| 176   | Sceptrumlabdalactone B                                                                                             | <i>A. pahangensis</i>  | Rhizomes     | 51    |
| 177 * | Galanolactone                                                                                                      | <i>A. galanga</i>      | Seeds        | 52    |
|       |                                                                                                                    | <i>A. katsumadai</i>   | Aerial part  | 3     |
| 178   | Isocoronarin D                                                                                                     | <i>A. galangal</i>     | Seeds        | 47    |
|       |                                                                                                                    | <i>A. calcarata</i>    | Rhizomes     | 46    |
| 179 * | Galaganin                                                                                                          | <i>A. galanga</i>      | Seeds        | 63    |
| 180   | Labda-8(17),13(14)-dien-15,16-olide                                                                                | <i>A. pahangensis</i>  | Rhizomes     | 51    |
| 181   | Ottensinin                                                                                                         | <i>A. pahangensis</i>  | Rhizomes     | 51    |
| 182 * | Methyl<br>(11E)-14,15,16-trinorlabda-8(17),11-dien-13-oate                                                         | <i>A. japonica</i>     | Rhizomes     | 44    |
|       |                                                                                                                    | <i>A. japonica</i>     | Rhizomes     | 44    |
| 183   | (12E)-17-Norlabd-12-en-8-one-16,15-olide                                                                           | <i>A. japonica</i>     | Rhizomes     | 44    |
| 184   | (12Z,14R)-Labda-8(17),12-diene-14,15,16-triol                                                                      | <i>A. japonica</i>     | Rhizomes     | 44    |
| 185 * | (12R)-15-Ethoxy-12-hydroxylabda-8(17),13(14)-dien-15,16-olide                                                      | <i>A. japonica</i>     | Rhizomes     | 44    |
| 186   | Coronararin D methyl ether                                                                                         | <i>A. japonica</i>     | Rhizomes     | 44    |
| 187   | Curcuminol D                                                                                                       | <i>A. japonica</i>     | Rhizomes     | 44    |
| 188 * | (E)-Labda-12,14-dien-15(16)-olide-17-oic acid                                                                      | <i>A. oxyphylla</i>    | Fruits       | 20    |
| 189 * | Alpindenoside A                                                                                                    | <i>A. densespicata</i> | Rhizomes     | 64    |
| 190 * | Alpindenoside B                                                                                                    | <i>A. densespicata</i> | Rhizomes     | 64    |
| 191 * | Alpindenoside C                                                                                                    | <i>A. densespicata</i> | Rhizomes     | 64    |
| 192 * | Alpindenoside D                                                                                                    | <i>A. densespicata</i> | Rhizomes     | 64    |
| 193 * | <i>rel</i> -Labd-12-en-15(16)-olid-7-one-8 <i>R</i> -spiro-1'-[2 <i>S</i> -(2,4,5-trimethoxyphenyl)-3-cyclohexene] | <i>A. flabellata</i>   | Leaves       | 65    |
| 194 * | Noralpindenoside A                                                                                                 | <i>A. densespicata</i> | Rhizomes     | 64    |
| 195 * | Noralpindenoside B                                                                                                 | <i>A. densespicata</i> | Rhizomes     | 64    |
| 196 * | 15-Hydroxy-11ξ,14ξ-peroxylabda-8(17),12-dien-16-al                                                                 | <i>A. chinensis</i>    | Flowers      | 56    |
| 197 * | 15-Hydroxy-11ξ,14ξ-peroxylabda-8(17),12-dien-16-al                                                                 | <i>A. chinensis</i>    | Flowers      | 56    |
| 198 * | Coronararin C                                                                                                      | <i>A. chinensis</i>    | Flowers      | 56    |
| 199 * | Galanal A                                                                                                          | <i>A. galanga</i>      | Seeds        | 52,53 |
| 200 * | Galanal B                                                                                                          | <i>A. galanga</i>      | Seeds        | 52,53 |
| 201 * | A mixed metabolite                                                                                                 | <i>A. katsumadai</i>   | Aerial parts | 3     |
| 202 * | Pahangensin A                                                                                                      | <i>A. pahangensis</i>  | Rhizomes     | 62    |
| 203 * | Pahangensin C                                                                                                      | <i>A. pahangensis</i>  | Rhizomes     | 51    |
| 204 * | Calcaratarin D                                                                                                     | <i>A. calcarata</i>    | Rhizomes     | 66    |
| 205 * | Calcaratarin E                                                                                                     | <i>A. calcarata</i>    | Rhizomes     | 66    |

| No.                     | Compound class and name                                                                            | Source                                          | part                               | Ref.             |
|-------------------------|----------------------------------------------------------------------------------------------------|-------------------------------------------------|------------------------------------|------------------|
| 206                     | Rhodomollein I                                                                                     | <i>A. katsumadai</i>                            | Seeds                              | 67               |
| <b>Triterpenoids</b>    |                                                                                                    |                                                 |                                    |                  |
| 207                     | 2,3,22,23-Tetrahydroxyl-2,6,10,15,19,23-hexamethyl-6,10,14,18-tetracosatetraene                    | <i>A. katsumadai</i>                            | Seeds                              | 68               |
| <b>Diarylheptanoids</b> |                                                                                                    |                                                 |                                    |                  |
| 208                     | 7- (4-Hydroxy-3-methoxyphenyl)-1-phenylheptane-3,5-diol                                            | <i>A. officinarum</i>                           | Rhizomes                           | 69,70            |
| 209                     | 7- (4-Hydroxy-3-methoxyphenyl)-1-(3,4-dihydroxyphenyl)-heptane-3,5-diol                            | <i>A. officinarum</i>                           | Rhizomes                           | 69               |
| 210                     | 5-Hydroxy-1,7-bis(4-hydroxy-3-methoxyphenyl)-heptan-3-one                                          | <i>A. officinarum</i>                           | Rhizomes                           | 69,71            |
| 211                     | Oxyphyllacinol                                                                                     | <i>A. oxyphylla</i>                             | Fruits                             | 19               |
| 212                     | Yakuchinone A                                                                                      | <i>A. oxyphylla</i>                             | Fruits                             | 17,19,72-77      |
| 213                     | Yakuchinone B                                                                                      | <i>A. oxyphylla</i>                             |                                    | 74               |
| 214                     | * 1-(3',5'-Dihydroxy-4'-methoxyphenyl)-7-phenyl-3-heptanone                                        | <i>A. oxyphylla</i>                             | Fruits                             | 73               |
| 215                     | * 1-(2',4'-Dihydroxy-3'-methoxyphenyl)-7-(4''-methoxyphenyl)-3-heptanone                           | <i>A. oxyphylla</i>                             | Fruits                             | 73               |
| 216                     | Neonootkatol                                                                                       | <i>A. oxyphylla</i>                             | Fruits                             | 78               |
| 217                     | * (3 <i>S</i> ,5 <i>S</i> )-3-Hydroxy-1-(4-hydroxyphenyl)-5-methoxy-7-phenyl-6( <i>E</i> )-heptene | <i>A. blepharocalyx</i>                         | Seeds                              | 79,80            |
| 218                     | * (3 <i>S</i> ,5 <i>R</i> )-3-Hydroxy-1-(4-hydroxyphenyl)-5-methoxy-7-phenyl-6( <i>E</i> )-heptene | <i>A. blepharocalyx</i>                         | Seeds                              | 79,80            |
| 219                     | * (3 <i>S</i> ,5 <i>S</i> )-3-Hydroxy-1-(4-hydroxyphenyl)-5-ethoxy-7-phenyl-6( <i>E</i> )-heptene  | <i>A. blepharocalyx</i>                         | Seeds                              | 79,80            |
| 220                     | * (3 <i>S</i> ,5 <i>R</i> )-3-Hydroxy-1-(4-hydroxyphenyl)-5-ethoxy-7-phenyl-6( <i>E</i> )-heptene  | <i>A. blepharocalyx</i>                         | Seeds                              | 79,80            |
| 221                     | 1,7-Bis(4-hydroxyphenyl)-3-hydroxy-1,3,6-heptatrien-5-one                                          | <i>A. blepharocalyx</i>                         | Seeds                              | 81               |
| 222                     | * 1,7-Bis(4-hydroxyphenyl)-hepta-4 <i>E</i> ,6 <i>E</i> -dien-3-one                                | <i>A. blepharocalyx</i>                         | Seeds                              | 79,80            |
| 223                     | * 1,7-Bis(4-hydroxyphenyl)-3-hydroxy-1,3-heptadien-5-one                                           | <i>A. blepharocalyx</i>                         | Seeds                              | 79-81            |
| 224                     | * (3 <i>S</i> )-Methoxy-1,7-bis(4-hydroxyphenyl)-6( <i>E</i> )-hepten-5-one                        | <i>A. blepharocalyx</i>                         | Seeds                              | 79,80            |
| 225                     | (3 <i>S</i> ,5 <i>S</i> )-3,5-Dihydroxy-1,7-bis(4-hydroxyphenyl)heptane                            | <i>A. blepharocalyx</i>                         | Seeds                              | 79,80            |
| 226                     | * (3 <i>S</i> ,5 <i>S</i> )- <i>trans</i> -3,5-Dihydroxy-1,7-diphenyl-1-heptene                    | <i>A. katsumadai</i> ,<br><i>A. pinnanensis</i> | Seeds and aerial parts<br>Rhizomes | 3,10,11,82<br>83 |
| 227                     | ( <i>E</i> , <i>E</i> )-5-Hydroxy-1,7-diphenyl-4,6-heptadien-3-one                                 | <i>A. katsumadai</i>                            | Seeds                              | 10               |
| 228                     | ( <i>S</i> )-1,7-Diphenyl-6( <i>E</i> )-hepten-3-ol                                                | <i>A. katsumadai</i>                            | Seeds                              | 10               |
| 229                     | Alnustone                                                                                          | <i>A. katsumadai</i>                            | Seeds                              | 2,10,11,82,84-86 |
| 230                     | (4 <i>Z</i> ,6 <i>E</i> )-5-Hydroxy-1,7-diphenyl-4,6-heptadien-3-one                               | <i>A. katsumadai</i>                            | Seeds                              | 11,84            |



| No.  | Compound class and name                                                                             | Source                | part         | Ref.  |
|------|-----------------------------------------------------------------------------------------------------|-----------------------|--------------|-------|
| 231  | (3 <i>S</i> ,5 <i>R</i> )-3,5-Dihydroxy-1,7-diphenyl-heptane                                        | <i>A. katsumadai</i>  | Seeds        | 11    |
| 232  | (5 <i>R</i> ,6 <i>E</i> )-1,7-Diphenyl-5-hydroxyhept-6-en-3-one                                     | <i>A. katsumadai</i>  | Seeds        | 2     |
| 233  | 5-Hydroxy-1-(4'-hydroxyphenyl)-7-phenyl-hepta-6-en-3-one                                            | <i>A. katsumadai</i>  | Aerial parts | 3     |
| 234  | * (-)-( <i>R</i> )-4''-Hydroxyashabushiketol                                                        | <i>A. katsumadai</i>  | Seeds        | 87    |
| 235  | * (3 <i>S</i> ,5 <i>S</i> )-Alpinikatin                                                             | <i>A. katsumadai</i>  | Seeds        | 87    |
| 236  | * 3-(Acetyloxy)alpinikatin                                                                          | <i>A. katsumadai</i>  | Seeds        | 88    |
| 237  | * 5-(Acetyloxy)alpinikatin                                                                          | <i>A. katsumadai</i>  | Seeds        | 88    |
| 238  | <i>trans</i> -1,7-Diphenyl-5-hydroxy-1-heptene                                                      | <i>A. katsumadai</i>  | Seeds        | 11    |
| 239  | 1,7-bis(4-Hydroxyphenyl)-1,4,6-heptatrien-3-one                                                     | <i>A. galangal</i>    | Rhizomes     | 89    |
| 240  | bisdemethoxycurcumin                                                                                | <i>A. galangal</i>    | Rhizomes     | 89    |
| 241  | 1,7-Diphenyl-5-hydroxy-6-hepten-3-one                                                               | <i>A. nutans</i>      |              | 90    |
|      |                                                                                                     | <i>A. rafflesiana</i> | Fruits       | 91    |
|      |                                                                                                     | <i>A. officinarum</i> | Rhizomes     | 92    |
| 229a | 1,7-Diphenyl-5-hydroxy-6-hepten-3-one                                                               | <i>A. mutica</i>      | Rhizomes     | 93    |
| 229b | (5 <i>R</i> )- <i>trans</i> -1,7-Diphenyl-5-hydroxy-6-hepten-3-one                                  | <i>A. katsumadai</i>  | Seeds        | 11    |
| 242  | * 5-Ethoxyl-7-(4-hydroxy-3-methoxy-phenyl)-1-phenyl-3-heptanone                                     | <i>A. officinarum</i> | Rhizomes     | 94    |
| 243  | * 5-Hydroxy-7-(4-hydroxy-3-methoxyphenyl)-1-(4-hydroxyphenyl)-3-heptanone                           | <i>A. officinarum</i> | Rhizomes     | 70    |
| 244  | 5-Hydroxy-1-(4-hydroxy-3-methoxyphenyl)-7-(4-hydroxyphenyl)-3-heptanone                             | <i>A. officinarum</i> | Rhizomes     | 70    |
| 245  | (5 <i>S</i> )-5-Hydroxy-7-(3,4-dihydroxyphenyl)-1-phenyl-3-heptanone                                | <i>A. officinarum</i> | Rhizomes     | 95    |
| 246  | (5 <i>R</i> )-5-Hydroxy-7-(3-methoxy-4,5-dihydroxyphenyl)-1-phenyl-3-heptanone                      | <i>A. officinarum</i> | Rhizomes     | 95    |
| 247  | (5 <i>R</i> )-5-Hydroxy-1-(3,4-dihydroxyphenyl)-7-(4-hydroxy-3-methoxyphenyl)-3-heptanone           | <i>A. officinarum</i> | Rhizomes     | 95    |
| 248  | * Alpinoid B                                                                                        | <i>A. officinarum</i> | Rhizomes     | 96    |
| 249  | * Alpinoid C                                                                                        | <i>A. officinarum</i> | Rhizomes     | 96    |
| 250  | (5 <i>S</i> )-7-(4-Hydroxyphenyl)-5-methoxy-1-phenylheptan-3-one                                    | <i>A. officinarum</i> | Rhizomes     | 96    |
| 251  | 5 <i>S</i> -Ethoxyl-7-(4-hydroxy-3-methoxyphenyl)-1-phenyl-3-heptanone                              | <i>A. officinarum</i> | Rhizomes     | 97,98 |
| 252  | * 5( <i>S</i> )-Acetoxy-7-(4-dihydroxyphenyl)-1-phenyl-3-heptanone                                  | <i>A. officinarum</i> | Rhizomes     | 99    |
| 253  | (5 <i>R</i> )-5-Hydroxy-1-(4-hydroxy-3-methoxyphenyl)-7-(4,5-dihydroxy-3-methoxyphenyl)-3-heptanone | <i>A. officinarum</i> | Rhizomes     | 99    |
| 254  | * 7-(4-Hydroxyphenyl)-1-phenyl-3-heptanone                                                          | <i>A. officinarum</i> | Rhizomes     | 97,98 |
| 255  | 1-(4-Hydroxyphenyl)-7-(4-hydroxy-3-methoxyphenyl)-4( <i>E</i> )-en-3-heptanone                      | <i>A. officinarum</i> | Rhizomes     | 99    |
| 256  | ( <i>E</i> )-7-(4-Hydroxy-3-methoxyphenyl)-1-phenylhept-4-en-3-one                                  | <i>A. officinarum</i> | Rhizomes     | 94    |

| No.  | Compound class and name                                                                                                         | Source                                     | part                 | Ref.                                        |
|------|---------------------------------------------------------------------------------------------------------------------------------|--------------------------------------------|----------------------|---------------------------------------------|
| 257  | 7-(3,4-Dihydroxyphenyl)-1-(4-hydroxy-3-methoxyphenyl)-4-en-3-heptanone                                                          | <i>A. officinarum</i>                      | Rhizomes             | 95                                          |
| 258  | (4 <i>E</i> ,6 <i>E</i> )-5-Hydroxy-1-(4-hydroxy-3-methoxyphenyl)-7-phenylhepta-4,6-dien-3-one                                  | <i>A. officinarum</i>                      | Rhizomes             | 92,97,98                                    |
| 259  | * 7-(4'',5''-Dihydroxy-3''-methoxyphenyl)-1-phenyl-4-heptene-3-one                                                              | <i>A. officinarum</i>                      | Rhizomes             | 92                                          |
| 260  | 5-Methoxy-7-(4''-hydroxyphenyl)-1-phenyl-3-heptanone                                                                            | <i>A. officinarum</i>                      | Rhizomes             | 92                                          |
| 261  | * 1,7-Diphenyl-5-heptene-3-one                                                                                                  | <i>A. officinarum</i>                      | Rhizomes             | 92                                          |
| 262  | 1,7-Diphenyl-3,5-heptadione                                                                                                     | <i>A. officinarum</i>                      | Rhizomes             | 92,100                                      |
| 263  | AO-5                                                                                                                            | <i>A. officinarum</i>                      | Rhizomes             | 69,92,96,100-106                            |
| 264  | Dihydroyashabushiketol                                                                                                          | <i>A. officinarum</i>                      | Rhizomes             | 92,94,101,102                               |
| 264a | (5 <i>R</i> )-5-Hydroxy-1,7-diphenylheptan-3-one                                                                                | <i>A. officinarum</i>                      | Rhizomes             | 96,106                                      |
| 265  | 5-Hydroxy-7-(4''-hydroxyphenyl)-1-phenyl-3-heptanone                                                                            | <i>A. officinarum</i>                      | Rhizomes             | 70,92,102,107                               |
| 266  | AO-1                                                                                                                            | <i>A. officinarum</i><br><i>A. galanga</i> | Rhizomes<br>Rhizomes | 69,92,94,101,102,104,105,<br>108,109<br>110 |
| 266a | (5 <i>R</i> )-5-Hydroxy-7-(4-hydroxy-3-methoxyphenyl)-1-phenylheptan-3-one                                                      | <i>A. officinarum</i>                      | Rhizomes             | 96-98,106                                   |
| 267  | AO-2                                                                                                                            | <i>A. officinarum</i>                      | Rhizomes             | 92,94,104,105,107                           |
| 267a | (5 <i>R</i> )-5-Methoxy-7-(4''-hydroxy-3''-methoxyphenyl)-1-phenyl-3-heptanone                                                  | <i>A. officinarum</i>                      | Rhizomes             | 96,106                                      |
| 268  | * 7-(4''-Hydroxy-3''-methoxyphenyl)-1-phenyl-3,5-heptadione                                                                     | <i>A. officinarum</i>                      |                      | 107                                         |
| 269  | AO-4                                                                                                                            | <i>A. officinarum</i><br><i>A. galanga</i> | Rhizomes<br>Rhizomes | 92,96,101,104-106<br>110                    |
| 270  | * 6-Hydroxy-1,7-diphenyl-4-en-3-heptanone                                                                                       | <i>A. officinarum</i>                      |                      | 103                                         |
| 271  | AO-3                                                                                                                            | <i>A. officinarum</i>                      | Rhizomes             | 96,100,104-106                              |
| 272  | (5 <i>S</i> )-5-Methoxy-1,7-diphenyl-3-heptanone                                                                                | <i>A. officinarum</i>                      | Rhizomes             | 103,106                                     |
| 273  | (3 <i>R</i> ,5 <i>R</i> )-1-(4-Hydroxyphenyl)-7-phenyl-3,5-heptanediol                                                          | <i>A. officinarum</i>                      | Rhizomes             | 70,111                                      |
| 274  | * (3 <i>S</i> ,7 <i>R</i> )-5,6-Dehydro-1,7-bis(4-hydroxyphenyl)-4''-de- <i>O</i> -methylcentrolobine                           | <i>A. blepharocalyx</i>                    | Seeds                | 79,112,113                                  |
| 275  | * (3 <i>S</i> ,5 <i>S</i> ,6 <i>S</i> ,7 <i>R</i> )-5,6-Dihydroxy-1,7-bis(4-hydroxyphenyl)-4''-de- <i>O</i> -methylcentrolobine | <i>A. blepharocalyx</i>                    | Seeds                | 79,113                                      |
| 276  | * (3 <i>S</i> ,5 <i>R</i> ,6 <i>S</i> ,7 <i>R</i> )-5,6-Dihydroxy-1,7-bis(4-hydroxyphenyl)-de- <i>O</i> -methylcentrolobine     | <i>A. blepharocalyx</i>                    | Seeds                | 79,113                                      |
| 277  | * (3 <i>S</i> ,5 <i>S</i> ,6 <i>R</i> ,7 <i>R</i> )-5,6-Dihydroxy-1,7-bis(4-hydroxyphenyl)-de- <i>O</i> -methylcentrolobine     | <i>A. blepharocalyx</i>                    | Seeds                | 79,113                                      |
| 278  | * (+)-De- <i>O</i> -methylcentrolobine                                                                                          | <i>A. blepharocalyx</i>                    | Seeds                | 114                                         |
| 279  | * (-)-De- <i>O</i> -methylcentrolobine                                                                                          | <i>A. blepharocalyx</i>                    | Seeds                | 114                                         |
| 280  | * (3 <i>S</i> ,5 <i>S</i> ,6 <i>S</i> ,7 <i>S</i> )-5,6-Dihydroxy-1,7-bis(4-hydroxyphenyl)-4''-de- <i>O</i> -methylcentrolobine | <i>A. blepharocalyx</i>                    | Seeds                | 114                                         |

| No. | Compound class and name                                                                                                        | Source                                           | part              | Ref.                 |
|-----|--------------------------------------------------------------------------------------------------------------------------------|--------------------------------------------------|-------------------|----------------------|
| 281 | * (3 <i>S</i> ,5 <i>R</i> ,6 <i>S</i> ,7 <i>S</i> )-5,6-Dihydroxy-1,7-bis(4-hydroxyphenyl)-4"-de- <i>O</i> -methylcentrolobine | <i>A. blepharocalyx</i>                          | Seeds             | 114                  |
| 282 | * (3 <i>S</i> ,5 <i>S</i> ,6 <i>R</i> ,7 <i>S</i> )-5,6-Dihydroxy-1,7-bis(4-hydroxyphenyl)-4"-de- <i>O</i> -methylcentrolobine | <i>A. blepharocalyx</i>                          | Seeds             | 114                  |
| 283 | * (3 <i>S</i> ,7 <i>S</i> )-5,6-Dehydro-4"-de- <i>O</i> -methylcentrolobine                                                    | <i>A. blepharocalyx</i>                          | Seeds             | 79,113               |
| 284 | 3,6-Furan-7-(4"-hydroxy-3"-methoxyphenyl)-1-phenyl heptane                                                                     | <i>A. officinarum</i>                            | Rhizomes          | 99                   |
| 285 | * Calyxin N                                                                                                                    | <i>A. katsumadai</i> .                           | Seeds             | 115                  |
| 286 | * Calyxin O                                                                                                                    | <i>A. katsumadai</i> .                           | Seeds             | 115                  |
| 287 | * <i>ent</i> -Calyxin O                                                                                                        | <i>A. katsumadai</i> .                           | Seeds             | 115                  |
| 288 | * <i>ent</i> -Calyxin N                                                                                                        | <i>A. katsumadai</i> .                           | Seeds             | 115                  |
| 289 | * Calyxin P                                                                                                                    | <i>A. katsumadai</i> .                           | Seeds             | 115                  |
| 290 | * 9"-Epicalyxin P                                                                                                              | <i>A. katsumadai</i> .                           | Seeds             | 115                  |
| 291 | * Calyxin S                                                                                                                    | <i>A. katsumadai</i> .                           | Seeds             | 115                  |
| 292 | * 5-Epicalyxin S                                                                                                               | <i>A. katsumadai</i> .                           | Seeds             | 115                  |
| 293 | * Calyxin E                                                                                                                    | <i>A. blepharocalyx</i>                          | Seeds             | 79,116,117           |
| 294 | * Calyxin G                                                                                                                    | <i>A. blepharocalyx</i>                          | Seeds             | 79,114,116,117       |
| 295 | * Epicalyxin G                                                                                                                 | <i>A. blepharocalyx</i>                          | Seeds             | 114,116              |
| 296 | * Calyxin M                                                                                                                    | <i>A. blepharocalyx</i>                          | Seeds             | 79,114,117           |
| 297 | * Epicalyxin M                                                                                                                 | <i>A. blepharocalyx</i>                          | Seeds             | 79,114,117           |
| 298 | * Calyxin J                                                                                                                    | <i>A. blepharocalyx</i>                          | Seeds             | 79,114,117           |
| 299 | * Epicalyxin J                                                                                                                 | <i>A. blepharocalyx</i>                          | Seeds             | 79,114,117           |
| 300 | * Calyxin K                                                                                                                    | <i>A. blepharocalyx</i>                          | Seeds             | 79,114,117           |
| 301 | * Epicalyxin K                                                                                                                 | <i>A. blepharocalyx</i>                          | Seeds             | 114                  |
| 302 | * Calyxin C                                                                                                                    | <i>A. blepharocalyx</i>                          | Seeds             | 79,114,118           |
| 303 | * Epicalyxin C                                                                                                                 | <i>A. blepharocalyx</i>                          | Seeds             | 79,114,118           |
| 304 | * Calyxin D                                                                                                                    | <i>A. blepharocalyx</i>                          | Seeds             | 79,114,118           |
| 305 | * Epicalyxin D                                                                                                                 | <i>A. blepharocalyx</i>                          | Seeds             | 79,114,118           |
| 306 | * Calyxin Q                                                                                                                    | <i>A. katsumadai</i> .                           | Seeds             | 115                  |
| 307 | * Calyxin R                                                                                                                    | <i>A. katsumadai</i> .                           | Seeds             | 115                  |
| 308 | Katsumain C                                                                                                                    | <i>A. katsumadai</i>                             | Seeds             | 87                   |
| 309 | * 7- <i>epi</i> -Katsumain C                                                                                                   | <i>A. katsumadai</i>                             | Seeds             | 87                   |
| 310 | * <i>ent</i> -Alpinnanin B                                                                                                     | <i>A. katsumadai</i>                             | Seeds             | 87                   |
| 311 | <i>ent</i> -Alpinnanin A                                                                                                       | <i>A. katsumadai</i>                             | Seeds             | 87                   |
| 312 | * <i>ent</i> -Calyxin H                                                                                                        | <i>A. katsumadai</i>                             | Seeds             | 87                   |
| 313 | * Katsumain D                                                                                                                  | <i>A. katsumadai</i>                             | Seeds             | 88                   |
| 314 | * Katsumain E                                                                                                                  | <i>A. katsumadai</i>                             | Seeds             | 88                   |
| 315 | * Katsumain F                                                                                                                  | <i>A. katsumadai</i>                             | Seeds             | 88                   |
| 316 | * Katsumain G                                                                                                                  | <i>A. katsumadai</i>                             | Seeds             | 88                   |
| 317 | * Katsumain A                                                                                                                  | <i>A. katsumadai</i>                             | Seeds             | 2                    |
| 318 | * Katsumain B                                                                                                                  | <i>A. katsumadai</i>                             | Seeds             | 2                    |
| 319 | * Calyxin B                                                                                                                    | <i>A. blepharocalyx</i><br><i>A. pinnanensis</i> | Seeds<br>Rhizomes | 79,114,118,119<br>83 |

| No.                     | Compound class and name                                                                                  | Source                  | part     | Ref.           |
|-------------------------|----------------------------------------------------------------------------------------------------------|-------------------------|----------|----------------|
| 320                     | * Epicalyxin B                                                                                           | <i>A. blepharocalyx</i> | Seeds    | 79,118,119     |
|                         |                                                                                                          | <i>A. pinnanensis</i>   | Rhizomes | 83             |
| 321                     | * Alpinnanin B                                                                                           | <i>A. katsumadai</i>    | Seeds    | 87             |
|                         |                                                                                                          | <i>A. pinnanensis</i>   | Rhizomes | 83             |
| 322                     | * Epicalyxin H                                                                                           | <i>A. katsumadai</i>    | Seeds    | 87             |
|                         |                                                                                                          | <i>A. blepharocalyx</i> | Seeds    | 79,120         |
|                         |                                                                                                          | <i>A. blepharocalyx</i> | Seeds    | 83             |
| 323                     | * CalyxinH                                                                                               | <i>A. katsumadai</i>    | Seeds    | 87             |
|                         |                                                                                                          | <i>A. blepharocalyx</i> | Seeds    | 79,120         |
|                         |                                                                                                          | <i>A. blepharocalyx</i> | Seeds    | 83             |
| 324                     | * Calyxin I                                                                                              | <i>A. blepharocalyx</i> | Seeds    | 79,121         |
| 325                     | * Calyxin L                                                                                              | <i>A. blepharocalyx</i> | Seeds    | 79,117         |
| 326                     | * Epicalyxin I                                                                                           | <i>A. blepharocalyx</i> | Seeds    | 79,117         |
| 327                     | * Epicalyxin F                                                                                           | <i>A. blepharocalyx</i> | Seeds    | 79,117,121     |
| 328                     | Calyxins F                                                                                               | <i>A. blepharocalyx</i> | Seeds    | 79,116,117     |
| 329                     | * 6-Hydroxycalyxin F                                                                                     | <i>A. blepharocalyx</i> | Seeds    | 79,116         |
| 330                     | Calyxin A                                                                                                | <i>A. blepharocalyx</i> | Seeds    | 79,116,117,119 |
| 331                     | * Deoxycalyxin A                                                                                         | <i>A. blepharocalyx</i> | Seeds    | 79,117         |
|                         |                                                                                                          | <i>A. pinnanensis</i>   | Rhizomes | 83             |
| 332                     | * Alpinnanin A                                                                                           | <i>A. pinnanensis</i>   | Rhizomes | 83             |
| 333                     | * Alpinnanin C                                                                                           | <i>A. pinnanensis</i>   | Rhizomes | 83             |
| 334                     | * Officinin A                                                                                            | <i>A. officinarum</i>   | Rhizomes | 122            |
| 335                     | * Alpinin A                                                                                              | <i>A. officinarum</i>   | Rhizomes | 123            |
| 336                     | * Alpinin B                                                                                              | <i>A. officinarum</i>   | Rhizomes | 100            |
| 337                     | * Alpinoid A                                                                                             | <i>A. officinarum</i>   | Rhizomes | 96             |
| 338                     | * Alpinin C                                                                                              | <i>A. officinarum</i>   | Rhizomes | 98             |
| 339                     | * Alpinin D                                                                                              | <i>A. officinarum</i>   | Rhizomes | 98             |
| 340                     | * Blepharocalyxin A                                                                                      | <i>A. blepharocalyx</i> | Seeds    | 79,120,124     |
| 341                     | * Blepharocalyxin B                                                                                      | <i>A. blepharocalyx</i> | Seeds    | 79,120,124     |
| 342                     | * Blepharocalyxin C                                                                                      | <i>A. blepharocalyx</i> | Seeds    | 79,113,125     |
| 343                     | * Blepharocalyxin D                                                                                      | <i>A. blepharocalyx</i> | Seeds    | 79,113,125     |
| 344                     | * Blepharocalyxin E                                                                                      | <i>A. blepharocalyx</i> | Seeds    | 79,113,125     |
| 345                     | * Neocalyxin A                                                                                           | <i>A. blepharocalyx</i> | Seeds    | 79,117         |
| 346                     | * Neocalyxin B                                                                                           | <i>A. blepharocalyx</i> | Seeds    | 79,117         |
| 347                     | * Officinaruminane B                                                                                     | <i>A. officinarum</i>   | Rhizomes | 99             |
| 348                     | * Katsumadain A                                                                                          | <i>A. katsumadai</i>    | Seeds    | 10,126         |
| 349                     | * Katsumadain B                                                                                          | <i>A. katsumadai</i>    | Seeds    | 126            |
| 350                     | * 4-Phenethyl-1,7-diphenyl-1-heptene-3,5-dione                                                           | <i>A. officinarum</i>   | Rhizomes | 92             |
| <b>Phenylpropanoids</b> |                                                                                                          |                         |          |                |
| 351                     | * <i>cis</i> -1-(2,4,5-Trimethoxy- <i>E</i> -styryl)-2-(2,4,5-trimethoxy- <i>Z</i> -styryl)cyclobutane   | <i>A. flabellata</i>    | Leaves   | 127,128        |
| 352                     | * <i>trans</i> -1-(2,4,5-Trimethoxy- <i>E</i> -styryl)-2-(2,4,5-trimethoxy- <i>Z</i> -styryl)cyclobutane | <i>A. flabellata</i>    | Leaves   | 127,128        |

| No.               | Compound class and name                                                                               | Source                | part         | Ref.     |
|-------------------|-------------------------------------------------------------------------------------------------------|-----------------------|--------------|----------|
| 353               | * 1,2-Bis(2,4,5-trimethoxy-Z-styryl)-cyclobutane                                                      | <i>A. flabellata</i>  | Leaves       | 128      |
| 354               | * (4E)-1,5-Bis(4-hydroxyphenyl)-1-methoxy-2-(methoxymethyl)-4-pentene                                 | <i>A. officinarum</i> | Rhizomes     | 129      |
| 355               | * (4E)-1,5-Bis(4-hydroxyphenyl)-1-ethoxy-2-(methoxymethyl)-4-pentene                                  | <i>A. officinarum</i> | Rhizomes     | 129      |
| 356               | * (4E)-1,5-Bis(4-hydroxyphenyl)-1-[(2E)-3-(4-acetoxyphe-nyl)-2-propenoxy]-2-(methoxymethyl)-4-pentene | <i>A. officinarum</i> | Rhizomes     | 129      |
| 357               | * (4E)-1,5-Bis(4-hydroxyphenyl)-2-(methoxymethyl)-4-penten-1-ol                                       | <i>A. officinarum</i> | Rhizomes     | 129      |
| 358               | * (4E)-1,5-Bis(4-hydroxyphenyl)-2-(hydroxymethyl)-4-penten-1-ol                                       | <i>A. officinarum</i> | Rhizomes     | 129      |
| 359               | * Katsumadin                                                                                          | <i>A. katsumadai</i>  | Seeds        | 84       |
| 360               | Galanganol B                                                                                          | <i>A. galanga</i>     | Rhizome      | 130      |
| <b>Lignans</b>    |                                                                                                       |                       |              |          |
| 361               | * Conchigeranal A                                                                                     | <i>A. conchigera</i>  | Whole plant  | 131      |
| 362               | * Conchigeranal B                                                                                     | <i>A. conchigera</i>  | Whole plant  | 131      |
| 363               | * Conchigeranal C                                                                                     | <i>A. conchigera</i>  | Whole plant  | 131      |
| 364               | * Conchigeranal D                                                                                     | <i>A. conchigera</i>  | Whole plant  | 131      |
| 365               | * Conchigeranal E                                                                                     | <i>A. conchigera</i>  | Whole plant  | 131      |
| 366               | * Galanganal                                                                                          | <i>A. conchigera</i>  | Whole plant  | 131      |
|                   |                                                                                                       | <i>A. galangal</i>    | Rhizomes     | 132      |
| 367               | * Galanganol A                                                                                        | <i>A. conchigera</i>  | Whole plant  | 131      |
|                   |                                                                                                       | <i>A. galangal</i>    | Rhizomes     | 132      |
| 368               | * Galanganol B                                                                                        | <i>A. conchigera</i>  | Whole plant  | 131      |
|                   |                                                                                                       | <i>A. galangal</i>    | Rhizomes     | 132      |
| 369               | Galanganol C                                                                                          | <i>A. galangal</i>    | Rhizomes     | 132      |
| 370               | * Conchignan A                                                                                        | <i>A. conchigera</i>  | Whole plants | 133      |
| 371               | * Conchignan B                                                                                        | <i>A. conchigera</i>  | Whole plants | 133      |
| 372               | * Conchignan C                                                                                        | <i>A. conchigera</i>  | Whole plants | 133      |
| 373               | * 7-Methoxycoumarin                                                                                   | <i>A. calcarata</i>   | Rhizomes     | 46       |
| 374               | Citrusin B                                                                                            | <i>A. speciosa</i>    | Leaves       | 134      |
| 375               | 2,3-Dihydro-2-(4-β-D-glucopyranosyl-3-methoxyphenyl)-3-hydroxymethyl-7-hydroxy-5-benzofranpropanol    | <i>A. speciosa</i>    | Leaves       | 134      |
| <b>Flavonoids</b> |                                                                                                       |                       |              |          |
| 376               | Tectochrysin                                                                                          | <i>A. oxyphylla</i>   | Rhizomes     | 135      |
|                   |                                                                                                       | <i>A. oxyphylla</i>   | Fruit        | 13,19,73 |
| 377               | Chrysin                                                                                               | <i>A. oxyphylla</i>   | Fruit        | 13,19,73 |
|                   |                                                                                                       | <i>A. oxyphylla</i>   | Rhizomes     | 135      |
| 378               | Apigenin                                                                                              | <i>A. bracteata</i>   | Rhizomes     | 136      |
|                   |                                                                                                       | <i>A. officinarum</i> | Rhizomes     | 103,137  |
| 379               | 5-Hydroxy-7,8-dimethoxyflavone                                                                        | <i>A. galanga</i>     | Seeds        | 63       |
| 380               | 5-Hydroxy-2',7,8-trimethoxyflavone                                                                    | <i>A. galanga</i>     | Seeds        | 63       |
| 381               | 5-Hydroxy-7,8,2',5'-tetramethoxyflavone                                                               | <i>A. galanga</i>     | Seeds        | 63       |

| No. | Compound class and name                | Source                 | part            | Ref.        |
|-----|----------------------------------------|------------------------|-----------------|-------------|
| 382 | 5-Hydroxy-3',4',7-trimethoxy flavanone | <i>A. tonkinensis</i>  | Rhizomes        | 138         |
| 383 | Kaempferol-3,4'-dimethylether          | <i>A. sichuanensis</i> | Whole plant     | 6           |
| 384 | Galangin                               | <i>A. bracteata</i>    | Rhizomes        | 136         |
|     |                                        | <i>A. galangal</i>     | Rhizomes        | 130         |
|     |                                        | <i>A. officinarum</i>  | Rhizomes        | 137,139-141 |
|     |                                        | <i>A. sichuanensis</i> | Whole plant     | 6           |
|     |                                        | <i>A. galangal</i>     | Seed            | 142         |
|     |                                        | <i>A. katsumadai</i>   | Seed            | 143         |
| 385 | Kaempferide                            | <i>A. officinarum</i>  | Rhizomes        | 139,140     |
|     |                                        | <i>A. sichuanensis</i> | Whole plant     | 6           |
|     |                                        | <i>A. oxyphylla</i>    | Rhizoms, fruits | 73,135      |
|     |                                        | <i>A. tonkinensis</i>  | Rhizoms         | 138         |
| 386 | Kaempferol                             | <i>A. sichuanensis</i> | Whole plant     | 6           |
|     |                                        | <i>A. officinarum</i>  | Rhizomes        | 139         |
| 387 | 3-Methoxykaempferol                    | <i>A. speciosa</i>     | Rhizomes        | 144         |
|     |                                        | <i>A. galangal</i>     | Seeds           | 142         |
|     |                                        | <i>A. katsumadai</i>   | Seeds           | 143         |
|     |                                        | <i>A. tonkinensis</i>  | Rhizomes        | 145         |
| 388 | 3,5-Dihydroxy-7,4'-dimethoxyflavone    | <i>A. flabellata</i>   | Leaves          | 127,128     |
|     |                                        | <i>A. oxyphylla</i>    | Fruits          | 73,135      |
|     |                                        | <i>A. tonkinensis</i>  | Rhizomes        | 138         |
| 389 | Izalpinin                              | <i>A. oxyphylla</i>    | Fruits          | 142         |
|     |                                        | <i>A. oxyphylla</i>    | Fruits          | 73          |
|     |                                        | <i>A. oxyphylla</i>    | Rhizomes        | 145         |
| 390 | 3-Methylethergalangin                  | <i>A. officinarum</i>  | Rhizomes        | 139,146     |
|     |                                        | <i>A. galanga</i>      | Seeds           | 142         |
| 391 | Kumatakenin                            | <i>A. tonkinensis</i>  | Rhizomes        | 138         |
|     |                                        | <i>A. galangal</i>     | Seeds           | 142         |
|     |                                        | <i>A. katsumadai</i>   | Seeds           | 143         |
| 392 | Rhamnocitrin                           | <i>A. tonkinensis</i>  | Rhizome         | 145         |
|     |                                        | <i>A. oxyphylla</i>    | Seeds           | 27          |
| 393 | Quercetin                              | <i>A. officinarum</i>  | Rhizomes        | 139         |
|     |                                        | <i>A. tonkinensis</i>  | Rhizomes        | 145         |
| 394 | Ombuine                                | <i>A. tonkinensis</i>  | Rhizomes        | 138         |
| 395 | 4',5,7-Trimethoxyflavonol              | <i>A. tonkinensis</i>  | Rhizomes        | 138         |
| 396 | 5-Hydroxy-3,7,4'-trimethoxyflavone     | <i>A. flabellata</i>   | Leaves          | 147         |

| No.   | Compound class and name                                                                                                                           | Source                  | part             | Ref.    |
|-------|---------------------------------------------------------------------------------------------------------------------------------------------------|-------------------------|------------------|---------|
| 397   | Pinocembrin                                                                                                                                       | <i>A. malaccensis</i>   | Rhizomes         | 55      |
|       |                                                                                                                                                   | <i>A. bracteata</i>     | Rhizomes         | 136     |
|       |                                                                                                                                                   | <i>A. katsumadai</i>    | Seeds            | 84,85   |
|       |                                                                                                                                                   | <i>A. sichuanensis</i>  | Whole plant      | 6       |
|       |                                                                                                                                                   | <i>A. mutica</i>        | Rhizome          | 148,149 |
|       |                                                                                                                                                   | <i>A. galangal</i>      | Seeds            | 142     |
|       |                                                                                                                                                   | <i>A. oxyphylla</i>     | Rhizome          | 135     |
|       |                                                                                                                                                   | <i>A. officinarum</i>   | Rhizomes         | 139     |
|       |                                                                                                                                                   | <i>A. rafflesiana</i>   | Rhizomes, fruits | 91,93   |
|       |                                                                                                                                                   | <i>A. gagnepainii</i>   | Rhizomes         | 150     |
|       |                                                                                                                                                   | <i>A. nutans</i>        | Rhizomes         | 90      |
|       | <i>A. speciosa</i>                                                                                                                                | Leaves                  | 144              |         |
| 398   | Alpinetin                                                                                                                                         | <i>A. malaccensis</i>   | Rhizomes         | 55      |
|       |                                                                                                                                                   | <i>A. bracteata</i>     | Rhizomes         | 136     |
|       |                                                                                                                                                   | <i>A. speciosa</i>      | Rhizomes         | 151     |
|       |                                                                                                                                                   | <i>A. katsumadai</i>    | Rhizomes         | 84,85   |
|       |                                                                                                                                                   | <i>A. pinnanensis</i>   | Seeds            | 83      |
|       |                                                                                                                                                   | <i>A. mutica</i>        | Rhizomes         | 152     |
| 399   | 7,4'-Dihydroxy-5-methoxy flavanone                                                                                                                | <i>A. katsumadai</i>    | Seeds            | 84      |
|       |                                                                                                                                                   | <i>A. blepharocalyx</i> | Seeds            | 80,81   |
|       |                                                                                                                                                   | <i>A. gagnepainii</i>   | Rhizomes         | 150     |
|       | <i>A. pinnanensis</i>                                                                                                                             | Rhizomes                | 83               |         |
| 400   | Pinostrobin                                                                                                                                       | <i>A. mutica</i>        | Rhizome          | 148     |
|       |                                                                                                                                                   | <i>A. rafflesiana</i>   | Fruits           | 91      |
| 401   | Pinobanksin                                                                                                                                       | <i>A. galanga</i>       | Seeds            | 142     |
|       |                                                                                                                                                   | <i>A. katsumadai</i>    | Seeds            | 143     |
|       |                                                                                                                                                   | <i>A. officinarum</i>   | Aerial part      | 153     |
| 402 * | (2 <i>R</i> ,3 <i>S</i> )-Pinobaksin-3-cinnamate                                                                                                  | <i>A. galangal</i>      | Seeds            | 142,154 |
|       |                                                                                                                                                   | <i>A. katsumadai</i>    | Seeds            | 143     |
| 403   | 3- <i>O</i> -Acetylpinobanksin                                                                                                                    | <i>A. galangal</i>      | Seeds            | 142     |
|       |                                                                                                                                                   | <i>A. katsumadai</i>    | Seeds            | 143     |
| 404 * | <i>rel</i> -5-Hydroxy-7,4'-dimethoxy-2'' <i>S</i> -(2,4,5-trimethoxy- <i>E</i> -styryl)-tetrahydrofuro[4'' <i>R</i> ,5'' <i>R</i> :2,3]flavanonol | <i>A. flabellata</i>    | Leaves           | 147     |
| 405 * | <i>rel</i> -5-Hydroxy-7,4'-dimethoxy-3'' <i>S</i> -(2,4,5-trimethoxy- <i>Es</i> tyryl)tetrahydrofuro[4'' <i>R</i> ,5'' <i>R</i> :2,3]flavanonol   | <i>A. flabellata</i>    | Leaves           | 147     |
| 406   | Dihydrokaempferol                                                                                                                                 | <i>A. oxyphylla</i>     | Rhizomes         | 135     |
| 407   | Alpinone                                                                                                                                          | <i>A. galanga</i>       | Seeds            | 142     |
|       |                                                                                                                                                   | <i>A. japonica</i>      | Seeds            | 155     |
| 408   | Uvangoletin                                                                                                                                       | <i>A. katsumadai</i>    | Seeds            | 67      |
| 409   | Dihydroflavokawin B                                                                                                                               | <i>A. speciosa</i>      | Rhizomes         | 151     |
|       |                                                                                                                                                   | <i>A. formosana</i>     | Rhizomes         | 40      |

| No. | Compound class and name             | Source                  | part        | Ref.      |
|-----|-------------------------------------|-------------------------|-------------|-----------|
| 410 | Flavokawin B                        | <i>A. speciosa</i>      | Rhizomes    | 151       |
|     |                                     | <i>A. mutica</i>        | Rhizomes    | 93,148    |
|     |                                     | <i>A. rafflesiana</i>   | Rhizomes    | 93        |
|     |                                     | <i>A. nutans</i>        | Rhizomes    | 90        |
|     |                                     | <i>A. pricei</i>        | Rhizomes    | 156       |
| 411 | Cardamomin                          | <i>A. bracteata</i>     | Rhizomes    | 136       |
|     |                                     | <i>A. speciosa</i>      | Rhizomes    | 144,151   |
|     |                                     | <i>A. gagnepaini</i>    | Rhizomes    | 150       |
|     |                                     | <i>A. blepharocalyx</i> | Seeds       | 81        |
|     |                                     | <i>A. katsumadai</i>    | Seeds       | 2,84,85   |
|     |                                     | <i>A. rafflesiana</i>   | Fruits      | 91,157    |
|     |                                     | <i>A. pricei</i>        | Rhizome     | 156       |
|     |                                     | <i>A. mutica</i>        | Fruits      | 149       |
|     |                                     | <i>A. katsumadai</i>    | Seeds       | 158       |
|     |                                     | <i>A. pinnanensis</i>   | Rhizomes    | 83        |
| 412 | * 2',3',4',6'-Tetrahydroxychalcone  | <i>A. rafflesiana</i>   | Fruits      | 91        |
|     |                                     | <i>A. pricei</i>        | Rhizomes    | 156       |
| 413 | 2',4',6'-Trimethoxychalcone         | <i>A. pricei</i>        | Rhizomes    | 156       |
| 414 | Pinostrobin chalcone                | <i>A. pricei</i>        | Rhizomes    | 156       |
|     |                                     | <i>A. speciosa</i>      | Rhizomes    | 144       |
| 415 | Helichrysetin                       | <i>A. blepharocalyx</i> | Seeds       | 80,81,121 |
|     |                                     | <i>A. katsumadai</i>    | Seeds       | 67        |
| 416 | 2,6-Dimethoxy-4,4-dihydroxychalcone | <i>A. blepharocalyx</i> | Seeds       | 80        |
| 417 | 4,4-Dihydroxychalcone               | <i>A. blepharocalyx</i> | Seeds       | 80        |
| 418 | Pinocembrin chalcone                | <i>A. katsumadai</i>    |             | 85        |
| 419 | 4',6'-Dimethylchalconaringenin      | <i>A. pinnanensis</i>   | Rhizomes    | 83        |
| 420 | * Galanganone A                     | <i>A. galanga</i>       | Rhizomes    | 159       |
| 421 | * Galanganone B                     | <i>A. galanga</i>       | Rhizomes    | 159       |
| 422 | * Galanganone C                     | <i>A. galanga</i>       | Rhizomes    | 159       |
| 423 | (+) -Catechin                       | <i>A. zerumbet</i>      | Leaves      | 160       |
|     |                                     | <i>A. katsumadai</i>    | Seeds       | 161       |
| 424 | Epicatechin                         | <i>A. oxymitra</i>      | Rhizomes    | 35        |
|     |                                     | <i>A. zerumbet</i>      | Leaves      | 160       |
| 425 | Galloepicatechin                    | <i>A. oxymitra</i>      | Rhizomes    | 35        |
| 426 | (+) -Epicatechin                    | <i>A. speciosa</i>      | Rhizome     | 162       |
| 427 | Kaempferide-3-O-β-D-glucoside       | <i>A. officinarum</i>   | Rhizomes    | 140       |
|     |                                     |                         |             | 141       |
| 428 | Kaempferol 3-O-glucoside            | <i>A. speciosa</i> ,    |             | 163       |
|     |                                     | <i>A. nigra</i>         | Seeds       | 164       |
|     |                                     | <i>A. sichuanensis</i>  | Whole plant | 6         |



| No.              | Compound class and name                                                                                              | Source                 | part        | Ref.            |
|------------------|----------------------------------------------------------------------------------------------------------------------|------------------------|-------------|-----------------|
| 429              | Kaempferol 3-O-glucuronide                                                                                           | <i>A. speciosa</i> ,   |             | 163             |
|                  |                                                                                                                      | <i>A. zerumbet</i>     | Leaves      | 160             |
|                  |                                                                                                                      | <i>A. jianganfeng</i>  | Rhizome     | 165             |
|                  |                                                                                                                      | <i>A. nigra</i>        | Seeds       | 164             |
| 430              | Quercetin 3-O-glucoside                                                                                              | <i>A. speciosa</i> ,   |             | 163             |
| 431              | Quercetin 3-O-glucuronide                                                                                            | <i>A. speciosa</i> ,   |             | 163             |
| 432              | Quercetin 3-O- $\beta$ -D-rhamnosyl-(1,6)-galactoside                                                                | <i>A. speciosa</i> ,   |             | 163             |
| 433              | Quercetin 3-O-robinobioside                                                                                          | <i>A. katsumadai</i>   | Seeds       | 161             |
| 434 *            | Galangoflavonoside                                                                                                   | <i>A. galanga</i>      | Rhizomes    | 166             |
| 435              | Kaempferol-3-O- $\alpha$ -L-rhamnosyl-(1 $\rightarrow$ 2)-O-L-rhamnoside                                             | <i>A. densespicata</i> | Rhizomes    | 64              |
| 436              | Quercetin-3-O- $\alpha$ -L-rhamnosyl-(1 $\rightarrow$ 2)-O- $\alpha$ -L-rhamnoside                                   | <i>A. densespicata</i> | Rhizomes    | 64              |
| 437              | Morin-7-O- $\beta$ -D-glucopyranoside                                                                                | <i>A. densespicata</i> | Rhizomes    | 64              |
| 438              | Quercetin 3-O-(2, 6-di-O-rhamnopyranosyl galactopyranoside)                                                          | <i>A. katsumadai</i>   | Seeds       | 161             |
| 439              | Isorhamnetin 3-O-(2, 6-di-O-rhamnopyranosyl galactopyranoside)                                                       | <i>A. katsumadai</i>   | Seeds       | 161             |
| 440              | Pinocembrin-3,7-di- $\beta$ -D-glucoside                                                                             | <i>A. katsumadai</i>   | Seeds       | 161             |
| 441              | Isorhamnetin-3-O- $\beta$ -D-galactosyl-(6 $\rightarrow$ 1)- $\alpha$ -L-rhamnoside                                  | <i>A. tonkinensis</i>  | Rhizomes    | 5               |
| 442              | Rutin                                                                                                                | <i>A. zerumbet</i>     | Leaves      | 160             |
| 443              | Kaempferol-3-O-rutinoside                                                                                            | <i>A. zerumbet</i>     | Leaves      | 160             |
| 444              | Hesperidin                                                                                                           | <i>A. sichuanensis</i> | Whole plant | 6               |
| 445              | triflavonoid                                                                                                         | <i>A. platyichilus</i> | Rhizomes    | 167             |
| 446              | ( $\pm$ )-1-[5-(2-methoxy-4,4'-dihydroxy-4-hydroxyphenyl)]-1-(4-hydroxyphenyl)-3-(2-methoxy-4-hydroxyphenyl) propane | <i>A. platyichilus</i> | Rhizomes    | 167             |
| <b>Phenolics</b> |                                                                                                                      |                        |             |                 |
| 447 *            | [Di-( <i>p</i> -hydroxy- <i>cis</i> -styryl)] methane                                                                | <i>A. galanga</i>      | Rhizomes    | 168             |
| 448 *            | Alpininone                                                                                                           | <i>A. gagnepainii</i>  | Rhizomes    | 150             |
| 449 *            | (1 <i>E</i> ,4 <i>Z</i> )-5-Hydroxy-1-phenylhexa-1,4-dien-3-one                                                      | <i>A. katsumadai</i>   | Seeds       | 67              |
| 450              | 2-Propenal,3-[4-(acetyloxy)-3-methoxyphenyl]                                                                         | <i>A. galangal</i>     | Seeds       | 47              |
| 451              | Dibutyl phthalate                                                                                                    | <i>A. sichuanensi</i>  | Whole plant | 6               |
|                  |                                                                                                                      | <i>A. oxyphylla</i>    | Seeds       | 169             |
| 452              | ( <i>E</i> )- <i>p</i> -Coumaryl alcohol                                                                             | <i>A. officinarum</i>  | Rhizomes    | 129             |
| 453              | (E)- <i>p</i> -Coumaryl alcohol $\gamma$ -O-methyl ether                                                             | <i>A. officinarum</i>  | Rhizomes    | 129             |
|                  |                                                                                                                      | <i>A. galanga</i>      | Rhizomes    | 170             |
| 454              | <i>trans-p</i> -Hydroxycinnamaldehyde                                                                                | <i>A. galanga</i>      | Rhizomes    | 132,171,172     |
|                  |                                                                                                                      | <i>A. conchigera</i>   | Rhizomes    | 42,136          |
| 455              | <i>trans-p</i> -Hydroxycinnamyl acetate                                                                              | <i>A. galanga</i>      | Rhizomes    | 132,171         |
|                  |                                                                                                                      | <i>A. conchigera</i>   | Rhizomes    | 42              |
| 456              | <i>trans-p</i> -Coumaryl alcohol                                                                                     | <i>A. galanga</i>      | Rhizomes    | 130,132,171,173 |

| No.   | Compound class and name                                                           | Source                  | part           | Ref.                       |
|-------|-----------------------------------------------------------------------------------|-------------------------|----------------|----------------------------|
| 457   | <i>trans-p</i> -Coumaryl diacetate                                                | <i>A. galanga</i>       | Rhizomes       | 130,132,171-174            |
|       |                                                                                   | <i>A. conchigera</i>    | Rhizomes       | 42                         |
| 458   | <i>trans-p</i> -Acetoxycinnamyl alcohol                                           | <i>A. galanga</i>       | Rhizomes       | 130                        |
| 459   | <i>trans-p</i> -Hydroxycinnamaldehyde acetate                                     | <i>A. galanga</i>       | Rhizomes       | 173                        |
| 460   | <i>p</i> -Coumaric acid                                                           | <i>A. galanga</i>       | Rhizomes       | 130                        |
|       |                                                                                   | <i>A. sichuanensis</i>  | Whole plant    | 6                          |
|       |                                                                                   | <i>A. speciosa</i>      |                | 163                        |
|       |                                                                                   | <i>A. blepharocalyx</i> | Seeds          | 80                         |
|       |                                                                                   | <i>A. oxyphylla</i>     | Rhizomes       | 135                        |
|       |                                                                                   |                         |                |                            |
| 461   | Methyl <i>trans</i> -cinnamate                                                    | <i>A. formosana</i>     | Rhizomes       | 40                         |
|       |                                                                                   | <i>A. speciosa</i>      | Rhizomes       | 151                        |
|       |                                                                                   | <i>A. tonkinensis</i>   | Rhizomes       | 5                          |
| 462   | Methyl <i>p</i> -hydroxycinnamate                                                 | <i>A. blepharocalyx</i> | Seeds          | 80                         |
| 463   | Methyl <i>p</i> -hydroxycinnamyl ketone                                           | <i>A. blepharocalyx</i> | Seeds          | 80                         |
| 464   | 1'S-1'-Acetoxychavicol acetate                                                    | <i>A. galanga</i>       | Rhizomes       | 130,132,170,171,173-176    |
|       |                                                                                   | <i>A. conchigera</i>    | Rhizomes       | 47,130,177-181             |
| 465   | 1'-Acetoxyeugenol acetate                                                         | <i>A. galanga</i>       | Rhizomes,seeds | 41,130,171,173,175,182,183 |
|       |                                                                                   |                         |                |                            |
| 466   | Methyleugenol                                                                     | <i>A. galanga</i>       | Rhizomes       | 130,132,171                |
| 467   | Hydroxychavicol acetate                                                           | <i>A. galanga</i> .     | Rhizomes       | 181                        |
|       |                                                                                   | <i>A. conchigera</i>    | Rhizomes       | 42                         |
| 468   | <i>trans</i> -Coniferyl diacetate                                                 | <i>A. galanga</i>       | Rhizomes       | 174                        |
| 469 * | 4,4'[(2 <i>E</i> ,2' <i>E</i> )-Bis(prop-2-ene)-1,1'-oxy]-diphenyl-7,7'-diacetata | <i>A. galanga</i>       | Rhizomes       | 172                        |
| 470 * | ( <i>S</i> )-1'-Ethoxy chavicol acetate                                           | <i>A. galanga</i>       | Rhizomes       | 172                        |
| 471 * | ( <i>E</i> )-4-Acetoxy cinnamyl ethyl ether                                       | <i>A. galanga</i>       | Rhizomes       | 172                        |
| 472   | ( <i>E</i> )- <i>p</i> -Coumaryl alcohol ethyl ether                              | <i>A. galanga</i>       | Rhizomes       | 184                        |
| 473   | <i>trans</i> -3,4-Dimethoxycinnamyl alcohol                                       | <i>A. galanga</i>       | Rhizomes       | 130,175                    |
| 474   | ( <i>E</i> )- <i>p</i> -Acetoxycinnamyl alcohol                                   | <i>A. galanga</i>       | Rhizomes       | 184                        |
| 475   | <i>trans</i> -4-Methoxycinnamyl alcohol                                           | <i>A. galanga</i>       | Rhizomes       | 175                        |
| 476   | Chavicol acetate                                                                  | <i>A. conchigera</i>    | Rhizomes       | 42                         |
| 477   | 1'S-1'-Acetoxyeugenol acetate                                                     | <i>A. conchigera</i>    | Rhizomes       | 42                         |
|       |                                                                                   | <i>A. galanga</i>       | Rhizomes       | 47,174,176                 |
| 478   | ( <i>E</i> )-2,4,5-Trimethoxycinnamaldehyde                                       | <i>A. flabellata</i>    | Leaves         | 127,128                    |
| 479   | 2,4,5-Trimethoxybenzaldehyde                                                      | <i>A. flabellata</i>    | Leaves         | 127,128                    |
| 480 * | 4-Hydroxy-2-(2,4,5-trimethoxyphenyl)-2- <i>E</i> -butenal                         | <i>A. flabellata</i>    | Leaves         | 127                        |
| 481   | Ferulic acid                                                                      | <i>A. speciosa</i>      |                | 163                        |
| 482   | 2,4,5-Trimethoxybenzoic acid                                                      | <i>A. flabellata</i>    | Leaves         | 147                        |
| 483   | 2,4,5-Trimethoxycinnamic acid                                                     | <i>A. flabellata</i>    | Leaves         | 147                        |
| 484   | 3,5-Dihydroxy-4-methoxybenzoic acid                                               | <i>A. oxyphyllae</i>    | Seeds          | 185                        |
| 485   | 3-Methoxybenzoic acid                                                             | <i>A. sichuanensis</i>  | Whole plant    | 6                          |

| No.   | Compound class and name                                                                             | Source                  | part             | Ref.                  |
|-------|-----------------------------------------------------------------------------------------------------|-------------------------|------------------|-----------------------|
| 486   | Isovanillic acid                                                                                    | <i>A. sichuanensis</i>  | Whole plant      | 6                     |
| 487   | 2,5-Dihydroxybenzoic acid                                                                           | <i>A. galanga</i>       | Rhizomes         | 186                   |
| 488   | Vanillic acid                                                                                       | <i>A. oxyphyllae</i>    | Seeds            | 185                   |
| 489   | Protocatechuic acid                                                                                 | <i>A. oxyphylla</i>     | Fruits           | 17,187-192<br>193-195 |
|       |                                                                                                     | <i>A. katsumadai</i>    |                  | 86                    |
| 490   | 4-Hydroxybenzaldehyde                                                                               | <i>A. sichuanensis</i>  | Whole plant      | 6                     |
|       |                                                                                                     | <i>A. blepharocalyx</i> | Seeds            | 80,81                 |
|       |                                                                                                     | <i>A. bracteata</i>     | Rhizomes         | 136                   |
|       |                                                                                                     | <i>A. galanga</i>       | Rhizomes         | 132                   |
|       |                                                                                                     | <i>A. galanga</i>       | Seeds            | 174                   |
| 491   | Isovanillin                                                                                         | <i>A. oxyphylla</i>     | Fruits           | 45                    |
| 492   | Benzaldehyde                                                                                        | <i>A. sichuanensis</i>  | Whole plant      | 6                     |
| 493   | Vanillin                                                                                            | <i>A. conchigera.</i>   | Whole plant      | 133                   |
| 494   | Methyl-3-hydroxy-4-methoxybenzoate                                                                  | <i>A. conchigera</i>    |                  | 196                   |
| 495   | Phloroglucinol                                                                                      | <i>A. blepharocalyx</i> | Seeds            | 80                    |
|       |                                                                                                     | <i>A. conchigera.</i>   | Whole plant      | 133                   |
| 496   | 6-(2-Hydroxy-phenyl)-4-methoxy-2-pyrone                                                             | <i>A. officinarum</i>   |                  | 103                   |
| 497 * | Ethyl 4-O-feruloyl- $\beta$ -glucopyranoside                                                        | <i>A. speciosa</i>      | Rhizome          | 162                   |
| 498 * | 4-Hydroxy-3-methoxyphenyl<br>4-O-feruloyl- $\beta$ -glucopyranoside                                 | <i>A. speciosa</i>      | Rhizome          | 162                   |
| 499   | Benzyl $\beta$ -D-glucopyranoside                                                                   | <i>A. officinarum</i>   | Rhizome          | 9                     |
| 500   | 1-O- $\beta$ -D-Glucopyranosyl-4-allylbenzene                                                       | <i>A. officinarum</i>   | Rhizome          | 9                     |
|       |                                                                                                     | <i>A. galanga</i>       | Rhizomes         | 171                   |
| 501 * | 1-Hydroxy-2-O- $\beta$ -D-glucopyranosyl-4-allylbenzene                                             | <i>A. officinarum</i>   | Rhizome          | 9                     |
| 502 * | 1-O- $\beta$ -D-Glucopyranosyl-2-hydroxy-4-allylbenzene                                             | <i>A. officinarum</i>   | Rhizome          | 9                     |
| 503 * | 1-O-(6-O- $\alpha$ -L-Rhamnopyranosyl- $\beta$ -D-glucopyranosyl)-<br>2-hydroxy-4-allylbenzene      | <i>A. officinarum</i>   | Rhizome          | 9                     |
| 504 * | 1-O-(6-O- $\alpha$ -L-Rhamnopyranosyl- $\beta$ -D-glucopyranosyl)-<br>4-allylbenzene                | <i>A. officinarum</i>   | Rhizome          | 9                     |
| 505 * | 1,2-Di-O- $\beta$ -D-glucopyranosyl-4-allylbenzene                                                  | <i>A. officinarum</i>   | Rhizome          | 9                     |
| 506 * | Alpinoside A                                                                                        | <i>A. officinarum</i>   | Rhizome          | 197                   |
| 507 * | 4-Hydroxy-2-methoxyphenol- $\beta$ -D-{3''-O-[4'-<br>hydroxy-3'-methoxy(benzoate)]}-glucopyranoside | <i>A. bracteata</i>     | Rhizomes         | 136                   |
| 508   | Coniferin                                                                                           | <i>A. speciosa</i>      | Leaves           | 134                   |
| 509   | Syringin                                                                                            | <i>A. speciosa</i>      | Leaves           | 134                   |
| 509a  | AS-II                                                                                               | <i>A. speciosa</i>      | Leaves           | 198                   |
| 510   | Dihydro-5,6-dehydrokawain                                                                           | <i>A. speciosa</i>      | Leaves           | 151,198               |
|       |                                                                                                     | <i>A. zerumbet</i>      | Leaves, rhizomes | 58,59,160,199         |
|       |                                                                                                     | <i>A. formosana</i>     | Rhizomes         | 40                    |

| No.              | Compound class and name                                  | Source                  | part             | Ref.          |
|------------------|----------------------------------------------------------|-------------------------|------------------|---------------|
| 511              | 5,6-Dehydrokawain                                        | <i>A. rafflesiana</i>   | Fruits           | 91            |
|                  |                                                          | <i>A. zerumbet</i>      | Leaves, rhizomes | 58,59,160,199 |
|                  |                                                          | <i>A. mutica</i>        | Leaves, fruits   | 152           |
|                  |                                                          | <i>A. speciosa</i>      | Rhizomes         | 144           |
|                  |                                                          | <i>A. gagnepainii</i>   | Rhizomes         | 150           |
|                  |                                                          | <i>A. nutans</i>        | Rhizomes, roots  | 90            |
|                  |                                                          | <i>A. blepharocalyx</i> | Seeds            | 80,81         |
|                  |                                                          | <i>A. globosa</i>       | Rhizomes         | 200           |
|                  | <i>A. malaccensis</i>                                    | Rhizomes                | 55               |               |
| 512              | 4-Hydroxy-5,6-dehydrokawain                              | <i>A. blepharocalyx</i> | Seeds            | 80,81         |
| <b>Steroids</b>  |                                                          |                         |                  |               |
| 513              | $\beta$ -Sitosterol                                      | <i>A. sichuanensi</i>   | Whole plant      | 6             |
|                  |                                                          | <i>A. oxyphylla</i>     | Fruits           | 17            |
|                  |                                                          | <i>A. pinnanensis</i>   | Rhizomes         | 83            |
|                  |                                                          | <i>A. tonkinensis</i>   | Rhizomes         | 145           |
|                  |                                                          | <i>A. katsumada</i>     | Seeds            | 201           |
|                  |                                                          | <i>A. jiangang feng</i> | Rhizomes         | 165           |
|                  |                                                          | <i>A. conchigera</i>    | Rhizomes         | 42            |
| 514              | Stigmasterol                                             | <i>A. gagnepainii</i>   | Rhizomes         | 150           |
|                  |                                                          | <i>A. pinnanensis</i>   | Rhizomes         | 83            |
|                  |                                                          | <i>A. oxyphylla</i>     | Seeds            | 202           |
|                  |                                                          | <i>A. conchigera</i>    | Rhizomes         | 42            |
| 515              | $\beta$ -Sitosterol palmitate                            | <i>A. oxyphylla</i>     | Fruits           | 17            |
| 516              | 3-Hydroxy-stigmast-5-en-7-one                            | <i>A. jiangangfeng</i>  | Rhizomes         | 165           |
| 517              | Daucosterol                                              | <i>A. oxyphylla</i>     | Fruits           | 17            |
|                  |                                                          | <i>A. sichuanensi</i>   | Whole plant      | 6             |
|                  |                                                          | <i>A. blepharocalyx</i> | Seeds            | 80            |
|                  |                                                          | <i>A. pinnanensis</i>   | Rhizomes         | 83            |
| 518              | $\beta$ -Sitosterol 3-O- $\beta$ -D-6-palmitoylglucoside | <i>A. officinarum</i>   | Rhizomes         | 70            |
| 519              | $\beta$ -Sitosterol diglucosyl caprate                   | <i>A. galanga</i>       | Rhizomes         | 203           |
| <b>Alkaloids</b> |                                                          |                         |                  |               |
| 520              | Officinaruminane A                                       | <i>A. officinarum</i>   | Rhizomes         | 99            |
| 521              | Officinine B                                             | <i>A. officinarum</i>   | Rhizomes         | 204           |
| 522              | Aurantiamide acetate                                     | <i>A. katsumadai</i>    | Seeds            | 67            |
| 523              | Adenosine                                                | <i>A. katsumadai</i>    | Seeds            | 161           |
| 524              | Uracil                                                   | <i>A. katsumadai</i>    | Seeds            | 161           |
| 525              | Hypoxanthine                                             | <i>A. katsumadai</i>    | Seeds            | 161           |
| 526              | Adenine                                                  | <i>A. katsumadai</i>    | Seeds            | 161           |
| 527              | Nicotinic acid                                           | <i>A. katsumadai</i>    | Seeds            | 161           |
| <b>Stilbenes</b> |                                                          |                         |                  |               |
| 528              | (E)-3-Methoxy-5-hydroxystilbene                          | <i>A. katsumadai</i>    | Aerial parts     | 3             |
| 529              | (E)-3,5-Dihydroxystilbene                                | <i>A. katsumadai</i>    | Aerial parts     | 3             |
| 530              | (E)-3,5-Dimethoxystilbene                                | <i>A. katsumadai</i>    | Aerial parts     | 3             |

| No.    | Compound class and name                    | Source                | part         | Ref.    |
|--------|--------------------------------------------|-----------------------|--------------|---------|
| 531    | (E)-3,5-Dihydroxy-4'-methoxystilbene       | <i>A. katsumadai</i>  | Aerial parts | 3       |
| 532    | (Z)-3-Methoxy-5-hydroxystilbene            | <i>A. katsumadai</i>  | Aerial parts | 3       |
| 533    | (Z)-3,5-Dihydroxystilbene                  | <i>A. katsumadai</i>  | Aerial parts | 3,84    |
| Others |                                            |                       |              |         |
| 534    | 1-O-Monoheptadecanoin                      | <i>A. galanga</i>     | Rhizomes     | 205     |
| 535    | Palmitic acid                              | <i>A. oxyphylla</i>   | Seeds        | 202     |
| 536    | Succinic acid                              | <i>A. galanga</i>     | Rhizomes     | 205     |
|        |                                            | <i>A. oxyphylla</i>   | Seeds        | 27      |
| 537    | Docosanoic acid                            | <i>A. jianganfeng</i> | Rhizomes     | 165     |
| 538    | (S)-2-Pentanol-2-O-β-D-glucopyranoside     | <i>A. oxyphylla</i>   | Fruits       | 17      |
| 539    | 3-Methyl-but-2-en-1-yl-β-D-glucopyranoside | <i>A. officinarum</i> | Rhizomes     | 9       |
| 540    | n-Butyl-β-D-fructopyranoside               | <i>A. officinarum</i> | Rhizomes     | 197     |
| 541    | n-Pentadecane                              | <i>A. galanga</i>     | Seeds        | 41      |
| 542    | n-7-Heptadecene                            | <i>A. galanga</i>     | Seeds        | 41      |
| 543    | 1-O-Nonyl-xylitol                          | <i>A. oxyphylla</i>   |              | 169     |
| 544    | 5-Hydroxymethyl furfural                   | <i>A. oxyphylla</i>   | Seeds        | 169,206 |

\* New compounds.

## Reference

1. S. Z. Hua, J. G. Luo, X. B. Wang, J. S. Wang and L. Y. Kong, *Bioorg. Med. Chem. Lett.*, 2009, **19**, 2728.
2. Y. Y. Li, G. X. Chou and Z. T. Wang, *Helv. Chim. Acta*, 2010, **93**, 382.
3. K. S. Ngo and G. D. Brown, *Phytochemistry*, 1998, **47**, 1117.
4. S. Lai-King and G. D. Brown, *Phytochemistry*, 1997, **45**, 537.
5. J. Zhang and L. Y. Kong, *J. Asian Nat. Prod. Res.*, 2004, **6**, 199.
6. D. Liu, W. Qu and J. Y. Liang, *Biochem. Syst. Ecol.*, 2013, **46**, 127.
7. J. J. Xu, N. H. Tan, Y. S. Chen, X. L. Pan, G. Z. Zeng, H. J. Han, C. J. Ji and M. J. Zhu, *Helv. Chim. Acta*, 2009, **92**, 1621.
8. Y. Someya, A. Kobayashi and K. Kubota, *Biosci. Biotechnol. Biochem.*, 2001, **65**, 950.
9. T. N. Ly, R. Yamauchi, M. Shimoyamada and K. Kato, *J. Agric. Food Chem.*, 2002, **50**, 4919.
10. U. Grienke, M. Schmidtke, J. Kirchmair, K. Pfarr, P. Wutzler, R. Dürrwald, G. Wolber, K. R. Liedl, H. Stuppner and J. M. Rollinger, *J. Med. Chem.*, 2010, **53**, 778.
11. M. Kuroyanagi, T. Noro, S. Fukushima, R. Aiyama, A. Ikuta, H. Itokawa and M. Morita, *Chem. Pharm. Bull.*, 1983, **31**, 1544.
12. M. Morita, H. Nakanishi, H. Morita, S. Mihashi and H. Itokawa, *Chem. Pharm. Bull.*, 1996, **44**, 1603.
13. T. Morikawa, H. Matsuda, I. Toguchida, K. Ueda and M. Yoshikawa, *J. Nat. Prod.*, 2002, **65**, 1468.
14. B. Jiang, W. J. Wang, M. P. Li, X. J. Huang, F. Huang, H. Gao, P. H. Sun, M. F. He, Z. J. Jiang, X. Q. Zhang and W. C. Ye, *Bioorg. Med. Chem. Lett.*, 2013, **23**, 3879.
15. J. J. Xu, J. Su, Y. Li and N. H. Tan, *Chem. Nat. Compd.*, 2013, **49**, 457.
16. J. Luo, X. Lv, X. Wang and L. Kong, *Phytochem. Lett.*, 2012, **5**, 134.

17. Z. J. Qing, Y. Wang, L. Y. Hui, L. W. Yong, L. H. Long, D. J. Ao and P. L. Xia, *Arch. Pharmacol Res.*, 2012, **35**, 2143.
18. P. Chen, P. P. Wang, Z. Z. Jiao and L. Xiang, *Helv. Chim. Acta*, 2014, **97**, 388.
19. D. H. Park, J. W. Lee, Q. Jin, W. K. Jeon, M. K. Lee and B. Y. Hwang, *Bull. Korean Chem. Soc.*, 2014, **35**, 1565.
20. L. Hou, G. Ding, B. L. Guo, W. H. Huang, X. J. Zhang, Z. Y. Sun and X. F. Shi, *Molecules*, 2015, **20**, 1551.
21. N. Shoji, A. Umeyama, Y. Asakawa, T. Takemoto, K. Nomoto and Y. Ohizumi, *Journal of Pharmaceutical Sciences*, 1984, **73**, 843.
22. M. Miyazawa, Y. Nakamura and Y. Ishikawa, *J. Agric. Food Chem.*, 2000, **48**, 3639.
23. P. Chen, L. Qu, L. Tian, P. P. Wang and L. Xiang, *Helv. Chim. Acta*, 2013, **96**, 1163.
24. H. Itokawa, H. Morita, T. Kobayashi, K. Watanabe and Y. Iitaka, *Chem. Pharm. Bull.*, 1987, **35**, 2860.
25. H. Itokawa, H. Morita, K. Watanabe, S. Mihashi and Y. Iitaka, *Chem. Pharm. Bull.*, 1985, **33**, 1148.
26. X. Luo, J. Yu, L. Xu, K. Li, P. Tan and J. Feng, *Yaoxue Xuebao*, 2000, **35**, 204.
27. L. Hou, X. X. Lu, B. B. Xie, W. H. Huang, J. G. Yu and B. L. Guo, *Tianran Chanwu Yanjiu Yu Kaifa*, 2013, **25**, 878.
28. J. J. Xu, N. H. Tan, J. Xiong, A. H. Adebayo, H. J. Han, G. Z. Zeng, C. J. Ji, Y. M. Zhang and M. J. Zhu, *Chin. Chem. Lett.*, 2009, **20**, 945.
29. X. Q. Lv, J. G. Luo, X. B. Wang, J. S. Wang, J. Luo and L. Y. Kong, *Chem. Pharm. Bull.*, 2011, **59**, 402.
30. J. Xu, C. Ji, Y. Zhang, J. Su, Y. Li and N. Tan, *Bioorg. Med. Chem. Lett.*, 2012, **22**, 1660.
31. H. Itokawa, H. Morita and K. Watanabe, *Chem. Pharm. Bull.*, 1987, **35**, 1460.
32. H. Itokawa, K. Watanabe, S. Mihashi and Y. Iitaka, *Chem. Pharm. Bull.*, 1980, **28**, 681.
33. O. Muraoka, M. Fujimoto, G. Tanabe, M. Kubo, T. Minematsu, H. Matsuda, T. Morikawa, I. Toguchida and M. Yoshikawa, *Bioorg. Med. Chem. Lett.*, 2001, **11**, 2217.
34. J. J. Xu, N. H. Tan, G. Z. Zeng, H. J. Han and Y. F. Peng, *Chin. J. Nat. Med.*, 2010, **8**, 6.
35. K. Jitsaeng, W. De-Eknamkul and B. Schneider, *Rec. Nat. Prod.*, 2009, **3**, 110.
36. S. M. Xu, X. J. Huang, Y. Wang and W. C. Ye, *Chin. J. Nat. Med.*, 2012, **10**, 374.
37. H. Itokawa, H. Morita, K. Osawa, K. Watanabe and Y. Iitaka, *Chem. Pharm. Bull.*, 1987, **35**, 2849.
38. H. Itokawa, H. Morita, K. Watanabe, A. Takase and Y. Iitaka, *Chem. Lett.*, 1984, **13**, 1687.
39. H. Itokawa, K. Watanabe, H. Morita, S. Mihashi and Y. Iitaka, *Chem. Pharm. Bull.*, 1985, **33**, 2023.
40. H. Itokawa, S. Yoshimoto and H. Morita, *Phytochemistry*, 1988, **27**, 435.
41. S. Mitsui, S. Kobayashi, H. Nagahori and A. Ogiso, *Chem. Pharm. Bull.*, 1976, **24**, 2377.
42. A. N. Aziz, H. Ibrahim, D. Rosmy Syamsir, M. Mohtar, J. Vejayan and K. Awang, *J. Ethnopharmacol.*, 2013, **145**, 798.
43. Q. M. Li, J. G. Luo, X. B. Wang, M. H. Yang and L. Y. Kong, *Fitoterapia*, 2013, **86**, 29.
44. Q. M. Li, J. G. Luo, M. H. Yang and L. Y. Kong, *Chem. Biodivers.*, 2015, **12**, 388.
45. J. Xu, N. Tan, G. Zeng, H. Han, H. Huang, C. Ji, M. Zhu and Y. Zhang, *Zhongguo Zhongyao Zazhi*, 2009, **34**, 990.
46. L. Y. Kong, M. J. Qin and M. Niwa, *J. Nat. Prod.*, 2000, **63**, 939.

47. Q. H. Zeng, C. L. Lu, X. W. Zhang and J. G. Jiang, *Food Funct.*, 2015, **6**, 431.
48. H. Itokawa, H. Morita, K. Watanabe and Y. Iitaka, *Chem. Lett.*, 1984, **13**, 451.
49. S. Ghosh, K. Indukuri, S. Bondalapati, A. K. Saikia and L. Rangan, *Eur. J. Med. Chem.*, 2013, **66**, 101.
50. S. Ghosh and L. Rangan, *Appl Biochem Biotechnol*, 2014, DOI: 10.1007/s12010-014-1366-4.
51. Y. Sivasothy, H. Ibrahim, A. S. Paliany, S. A. Alias, N. R. Md Nor and K. Awang, *Planta Med.*, 2013, **79**, 1775.
52. H. Morita and H. Itokawa, *Planta Med.*, 1988, **54**, 117.
53. H. Morita and H. Itokawa, *Chem. Lett.*, 1986, **15**, 1205.
54. H. Itokawa, M. Morita and S. Mihashi, *Chem. Pharm. Bull.*, 1980, **28**, 3452.
55. N. Nuntawong and A. Suksamrarn, *Biochem. Syst. Ecol.*, 2008, **36**, 661.
56. L. K. Sy and G. D. Brown, *J. Nat. Prod.*, 1997, **60**, 904.
57. J. Chompoo, A. Upadhyay, W. Kishimoto, T. Makise and S. Tawata, *Food Chem.*, 2011, **129**, 709.
58. J. Chompoo, A. Upadhyay, M. Fukuta and S. Tawata, *BMC Complement. Altern. Med.*, 2012, **12**, 106.
59. A. Upadhyay, J. Chompoo, W. Kishimoto, T. Makise and S. Tawata, *J. Agric. Food Chem.*, 2011, **59**, 2857.
60. H. Haraguchi, Y. Kuwata, K. Inada, K. Shingu, K. Miyahara, M. Nagao and A. Yagi, *Planta Med.*, 1996, **62**, 308.
61. H. X. Xu, H. Dong and K. Y. Sim, *Phytochemistry*, 1996, **42**, 149.
62. Y. Sivasothy, H. Ibrahim, A. S. Paliany, S. A. Alias and K. Awang, *Bioorg. Med. Chem. Lett.*, 2013, **23**, 6280.
63. V. S. Chauhan, M. Swapna and A. Singh, *Int. J. Appl. Biol. Pharm. Technol.*, 2014, **5**, 186.
64. Y. J. Kuo, P. C. Hsiao, L. J. Zhang, M. D. Wu, Y. H. Liang, H. O. Ho and Y. H. Kuo, *J. Nat. Prod.*, 2009, **72**, 1097.
65. S. Tesaki, H. Kikuzaki, S. Yonemori and N. Nakatani, *J. Nat. Prod.*, 2001, **64**, 515.
66. L. Y. Kong, M. J. Qin and M. Niwa, *Planta Med.*, 2002, **68**, 813.
67. X. B. Wang, C. S. Yang, S. Z. Hua and L. Y. Kong, *Zhongguo Tianran Yaowu*, 2010, **8**, 419.
68. S. Y. Choi, M. H. Lee, J. H. Choi and Y. K. Kim, *Biol. Pharm. Bull.*, 2012, **35**, 2092.
69. H. J. Lee, J. S. Kim and J. H. Ryu, *Planta Med.*, 2006, **72**, 68.
70. D. Shin, K. Kinoshita, K. Koyama and K. Takahashi, *J. Nat. Prod.*, 2002, **65**, 1315.
71. H. Itokawa, H. Morita, I. Midorikawa, R. Aiyama and M. Morita, *Chem. Pharm. Bull.*, 1985, **33**, 4889.
72. H. Itokawa, R. Aiyama and A. Ikuta, *Phytochemistry*, 1981, **20**, 769.
73. Q. Y. Bian, S. Y. Wang, L. J. Xu, C. O. Chan, D. K. W. Mok and S. B. Chen, *J. Asian Nat. Prod. Res.*, 2013, **15**, 1094.
74. K. S. Chun, Y. Sohn, H. S. Kim, O. H. Kim, K. K. Park, J. M. Lee, J. Lee, J. Y. Lee, A. Moon, S. S. Lee and Y. J. Surh, *Mutat. Res.*, 1999, **428**, 49.
75. N. Shoji, A. Umeyama, T. Takemoto and Y. Ohizumi, *Planta Med.*, 1984, **50**, 186.
76. Y. M. Chang, C. T. Tsai, C. C. R. Wang, Y. S. Chen, Y. M. Lin, C. H. Kuo, B. S. Tzang, R. J. Chen, F. J. Tsai and C. Y. Huang, *Biosci. Biotechnol. Biochem.*, 2013, **77**, 229.
77. R. J. Lin, C. M. Yen, T. H. Chou, F. Y. Chiang, G. H. Wang, Y. P. Tseng, L. Wang, T. W. Huang, H. C. Wang, L. P. Chan, H. Y. Ding and C. H. Liang, *BMC Complement. Altern. M.*, 2013, **13**,

78. Q. Zhang, S. Luo, H. Wang and D. Fan, *Zhongcaoyao*, 1997, **28**, 131.
79. S. Kadota, Y. Tezuka, J. K. Prasain, M. S. Ali and A. H. Banskota, *Curr. Top. Med. Chem.*, 2003, **3**, 203.
80. M. S. Ali, Y. Tezuka, S. Awale, A. H. Banskota and S. Kadota, *J. Nat. Prod.*, 2001, **64**, 289.
81. H. Dong, S. X. Chen, H. X. Xu, S. Kadota and T. Namba, *J. Nat. Prod.*, 1998, **61**, 142.
82. B. Groeblacher, O. Kunert and F. Bucar, *Bioorg. Med. Chem.*, 2012, **20**, 2701.
83. P. M. Giang, P. T. Son, K. Matsunami and H. Otsuka, *Chem. Pharm. Bull.*, 2005, **53**, 1335.
84. W. Z. Huang, C. F. Zhang, M. Zhang and Z. T. Wang, *J. Chin. Chem. Soc.*, 2007, **54**, 1553.
85. X. Xiao, X. Si, X. Tong and G. Li, *Sep. Purif. Technol.*, 2011, **81**, 265.
86. Y. Li, L. Yang, C. Wang, G. Chou and Z. Wang, *Shanghai Zhongyiyao Daxue Xuebao*, 2010, **24**, 72.
87. J. W. Nam, G. Y. Kang, A. R. Han, D. Lee, Y. S. Lee and E. K. Seo, *J. Nat. Prod.*, 2011, **74**, 2109.
88. J. W. Nam and E. K. Seo, *Helv. Chim. Acta*, 2013, **96**, 1670.
89. C. Y. Lo, P. L. Liu, L. C. Lin, Y. T. Chen, Y. C. Hseu, Z. H. Wen and H. M. Wang, *Sci. World J.*, 2013, 1.
90. M. Habsah, N. H. Lajis, A. M. Ali, M. A. Sukari, Y. Y. Hin, H. Kikuzaki and N. Nakatani, *Pharm. Biol.*, 2003, **41**, 7.
91. H. Mohamad, F. Abas, D. Permana, N. H. Lajis, A. M. Ali, M. A. Sukari, T. Y. Y. Hin, H. Kikuzaki and N. Nakatani, *Z. Naturforsch.C*, 2004, **59**, 811.
92. B. B. Zhang, Y. Dai, Z. X. Liao and L. S. Ding, *Fitoterapia*, 2010, **81**, 948.
93. H. M. Sirat, A. A. Rahman, H. Itokawa and H. Morita, *Planta Med.*, 1996, **62**, 188.
94. L. Zhao, W. Qu, J. Q. Fu and J. Y. Liang, *Chin. J. Nat. Med.*, 2010, **8**, 241.
95. N. An, Z. M. Zou, Z. Tian, X. Z. Luo, S. L. Yang and L. Z. Xu, *Fitoterapia*, 2007, **79**, 27.
96. Y. Sun, H. Matsubara, S. Kitanaka and K. Yasukawa, *Helv. Chim. Acta*, 2008, **91**, 118.
97. Y. Sun, K. Tabata, H. Matsubara, S. Kitanaka, T. Suzuki and K. Yasukawa, *Planta Med.*, 2008, **74**, 427.
98. D. Liu, Y. W. Liu, F. Q. Guan and J. Y. Liang, *Fitoterapia*, 2014, **96**, 76.
99. N. An, H. W. Zhang, L. Z. Xu, S. L. Yang and Z. M. Zou, *Food Chem.*, 2010, **119**, 513.
100. D. Liu, W. Qu, L. Zhao, F. Q. Guan and J. Y. Liang, *Chin. J. Nat. Med.*, 2014, **12**, 139.
101. H. Itokawa, M. Morita and S. Mihashi, *CHEMICAL & PHARMACEUTICAL BULLETIN*, 1981, **29**, 2383.
102. Y. U. Kim, H. K. Son, H. K. Song, M. J. Ahn, S. S. Lee and S. K. Lee, *Planta Med.*, 2003, **69**, 72.
103. G. J. Fan, Y. H. Kang, Y. N. Han and B. H. Han, *Bioorg. Med. Chem. Lett.*, 2007, **17**, 6720.
104. Z. Liu, M. M. Rafi, N. Zhu, K. Ryu, S. Sang, C. T. Ho and R. T. Rosen, *Separation and bioactivity of diarylheptanoids from lesser galangal (Alpinia officinarum)*, Washington, 2003.
105. Z. Liu, S. Sang, T. G. Hartman, C.-T. Ho and R. T. Rosen, *Phytochemical Analysis*, 2005, **16**, 252.
106. K. Yasukawa, Y. Sun, S. Kitanaka, N. Tomizawa, M. Miura and S. Motohashi, *J. Nat. Prod.*, 2008, **62**, 374.
107. F. Kiuchi, M. Shibuya and U. Sankawa, *Chem. Pharm. Bull.*, 1982, **30**, 2279.
108. J. E. Shin, M. J. Han, M. C. Song, N. I. Baek and D. H. Kim, *Biol. Pharm. Bull.*, 2004, **27**,



- 138.
109. H. B. Lee, H. K. Lee, J. R. Kim and Y. J. Ahn, *J. Korean Soc. Appl. Biol. Chem.*, 2009, **52**, 367.
110. X. Zhu, Y. Dou, X. Huang and L. Kong, *Zhongguo Xiandai Zhongyao*, 2008, **10**, 13.
111. S. I. Uehara, I. Yasuda, K. Akiyama, H. Morita, K. Takeya and H. Itokawa, *Chem. Pharm. Bull.*, 1987, **35**, 3298.
112. J. K. Prasain, Y. Tezuka, J. X. Li, K. Tanaka, P. Basnet, H. Dong, T. Namba and S. Kadota, *Planta Med.*, 1999, **65**, 196.
113. M. S. Ali, Y. Tezuka, A. H. Banskota and S. Kadota, *J. Nat. Prod.*, 2001, **64**, 491.
114. M. S. Ali, A. H. Banskota, Y. Tezuka, I. Saiki and S. Kadota, *Biol. Pharm. Bull.*, 2001, **24**, 525.
115. X. B. Wang, C. S. Yang, C. Zhang, J. Luo, M. H. Yang, J. G. Luo, W. Y. Yu and L. Y. Kong, *Tetrahedron*, 2014, **70**, 8714.
116. J. Kumar Prasain, Y. Tezuka, J. X. Li, K. Tanaka, P. Basnet, H. Dong, T. Namba and S. Kadota, *J. Chem. Res. (S)*, 1998, 22.
117. Y. Tezuka, M. B. Gewali, M. S. Ali, A. H. Banskota and S. Kadota, *J. Nat. Prod.*, 2001, **64**, 208.
118. J. Kumar Prasain, Y. Tezuka, J. Xin Li, K. Tanaka, P. Basnet, H. Dong, T. Namba and S. Kadota, *Tetrahedron*, 1997, **53**, 7833.
119. S. Kadota, D. Hui, P. Basnet, J. K. Prasain, G.-J. Xu and T. Namba, *CHEMICAL & PHARMACEUTICAL BULLETIN*, 1994, **42**, 2647.
120. J. K. Prasain, J. X. Li, Y. Tezuka, K. Tanaka, P. Basnet, H. Dong, T. Namba and S. Kadota, *J. Nat. Prod.*, 1998, **61**, 212.
121. M. B. Gewali, Y. Tezuka, A. H. Banskota, M. S. Ali, I. Saiki, H. Dong and S. Kadota, *Org. Lett.*, 1999, **1**, 1733.
122. L. Zhao, J. Y. Liang, J. Y. Zhang and Y. Chen, *Chin. Chem. Lett.*, 2010, **21**, 194.
123. D. Liu, W. Qu, L. Zhao and J. Y. Liang, *Chin. Chem. Lett.*, 2012, **23**, 189.
124. S. Kadota, J. K. Prasain, J. X. Li, P. Basnet, H. Dong, T. Tani and T. Namba, *Tetrahedron Lett.*, 1996, **37**, 7283.
125. Y. Tezuka, M. S. Ali, A. H. Banskota and S. Kadota, *Tetrahedron Lett.*, 2000, **31**, 5903.
126. Y. Yang, K. Kinoshita, K. Koyama, K. Takahashi, T. Tai, Y. Nunoura and K. Watanabe, *J. Nat. Prod.*, 1999, **62**, 1672.
127. S. Tesaki, H. Kikuzaki, S. Tanabe, M. Watanabe and N. Nakatani, *ITE Lett. Batteries, New Technol. Med.*, 2001, **2**, 106.
128. H. Kikuzaki, S. Tesaki, S. Yonemori and N. Nakatani, *Phytochemistry*, 2001, **56**, 109.
129. T. N. Ly, M. Shimoyamada, K. Kato and R. Yamauchi, *J. Agric. Food Chem.*, 2003, **51**, 4924.
130. A. Kaur, R. Singh, C. S. Dey, S. S. Sharma, K. K. Bhutani and I. P. Singh, *Indian J. Exp. Biol.*, 2010, **48**, 314.
131. J. J. Xu, G. Z. Zeng, S. C. Yang, Y. Shen and N. H. Tan, *Fitoterapia*, 2013, **91**, 82.
132. T. Morikawa, S. Ando, H. Matsuda, S. Kataoka, O. Muraoka and M. Yoshikawa, *Chem. Pharm. Bull.*, 2005, **53**, 625.
133. J. J. Xu, H. M. Zhao, Y. Shen, J. H. Chen, Y. Li, N. H. Tan and S. C. Yang, *J. Asian Nat. Prod. Res.*, 2013, **15**, 833.
134. T. Obata, A. Sawabe, M. Morita, N. Yamashita and Y. Matsubara, *J. Jpn. Oil Chem. Soc.*, 1995,

- 44**, 1012.
135. N. Wei, Y. Wang, H. H. Li, J. Q. Zhang and Y. H. Li, *Chem. Nat. Compd.*, 2013, **49**, 934.
136. L. Liu, J. Luo and L. Kong, *Chem. Nat. Compd.*, 2012, **48**, 785.
137. J. Zhao, W. Lu, H. Duan and L. Jiang, *Shanxi Yike Daxue Xuebao*, 2007, **38**, 604.
138. J. Zhang, Q. H. Guo and L. Y. Kong, *Zhongguo Zhong Yao Za Zhi*, 2003, **28**, 41.
139. N. An, S. Yang, Z. Zou and L. Xu, *Zhongcaoyao*, 2006, **37**, 663.
140. G. Eumkeb, S. Siriwong, S. Phitaktim, N. Rojtinnakorn and S. Sakdarat, *J. Appl. Microbiol.*, 2012, **112**, 55.
141. G. Eumkeb, S. Sakdarat and S. Siriwong, *Phytomedicine*, 2010, **18**, 40.
142. M. Q. Bian, H. Q. Wang, J. Kang, R. Y. Chen, Y. F. Yang and H. Z. Wu, *Yao Xue Xue Bao*, 2014, **49**, 359.
143. B. R. Xin, S. J. Ren and J. Li, *Zhongguo Zhong Yao Za Zhi*, 2014, **39**, 2674.
144. T. Ohtsuki, H. Kikuchi, T. Koyano, T. Kowithayakorn, T. Sakai and M. Ishibashi, *Bioorg. Med. Chem.*, 2009, **17**, 6748.
145. J. Zhang, X. He, J. Gao and L. Kong, *Zhongguo Yaoxue Zazhi (Beijing, China)*, 2003, **38**, 502.
146. J. E. Shin, M. J. Han and D. H. Kim, *Biol. Pharm. Bull.*, 2003, **26**, 854.
147. H. Kikuzaki and S. Tesaki, *J. Nat. Prod.*, 2002, **65**, 389.
148. N. A. Mustahil, M. A. Sukari, A. B. Abdul, N. A. Ali and G. E. C. Lian, *Pak. J. Pharm. Sci.*, 2013, **26**, 391.
149. I. Jantan, S. M. Raweh, H. M. Sirat, S. Jamil, Y. H. Mohd Yasin, J. Jalil and J. A. Jamal, *Phytomedicine*, 2008, **15**, 306.
150. H. T. Le, M. G. Phan and T. S. Phan, *J. Chem.*, 2007, **45**, 126.
151. H. Itokawa, M. Morita and S. Mihashi, *Phytochemistry*, 1981, **20**, 2503.
152. I. Jantan, M. Pizar, H. M. Sirat, N. Basar, S. Jamil, R. M. Ali and J. Jalil, *Phytother. Res.*, 2004, **18**, 1005.
153. H. Zhang, L.-x. Xu, P. Wu and X.-y. Wei, *Redai Yaredai Zhiwu Xuebao*, 2014, **22**, 89.
154. B. R. Xin, J. F. Liu, J. Kang and W. P. Chan, *Mol. Cell. Toxicol.*, 2014, **10**, 165.
155. J. Gripenberg and K. Silander, *Chem. Ind-london.*, 1955, 443.
156. C. T. Lin, K. J. Senthil Kumar, Y. H. Tseng, Z. J. Wang, M. Y. Pan, J. H. Xiao, S. C. Chien and S. Y. Wang, *J. Agric. Food Chem.*, 2009, **57**, 6060.
157. S. Ahmad, D. A. Israf, N. H. Lajis, K. Shaari, H. Mohamed, A. A. Wahab, K. T. Ariffin, W. Y. Hoo, N. A. Aziz, A. A. Kadir, M. R. Sulaiman and M. N. Somchit, *Eur. J. Pharmacol.*, 2006, **538**, 188.
158. Z. Wei, J. Yang, Y. F. Xia, W. Z. Huang, Z. T. Wang and Y. Dai, *J. Biochem. Mol. Toxicol.*, 2012, **26**, 282.
159. W. Q. Yang, Y. Gao, M. Li, D. R. Miao and F. Wang, *J. Asian Nat. Prod. Res.*, 2015, **17**, 783.
160. M. A. Mpalantinos, R. S. De Moura, J. P. Parente and R. M. Kuster, *Phytother. Res.*, 1998, **12**, 442.
161. Y. Y. Li, G. X. Chou and Z. T. Wang, *Zhongguo Tianran Yaowu*, 2009, **7**, 417.
162. T. Masuda, S. Mizuguchi, T. Tanaka, K. Iritani, Y. Takeda and S. Yonemori, *J. Agric. Food Chem.*, 2000, **48**, 1479.
163. N. Nakatani, *Oriental Foods and Herbs*, 2002, **859**, 166.
164. C. Qiao, Z. Wang, H. Dong, L. Xu and X. Hao, *Zhongcaoyao*, 2000, **31**, 404.
165. C. Qiao, X. Hao, Z. Wang and L. Xu, *Zhongguo Zhongyao Zazhi*, 2002, **27**, 130.

166. S. B. Jaju, N. H. Indurwade, D. M. Sakarkar, N. K. Fuloria, M. D. Ali, S. Das and S. P. Basu, *Trop. J. Pharm. Res.*, 2009, **8**, 545.
167. C. P. Shen, J. G. Luo, M. H. Yang and L. Y. Kong, *Fitoterapia*, 2015, **106**, 153.
168. B. R. Barik, A. B. Kundu and A. K. Dey, *Phytochemistry*, 1987, **26**, 2126.
169. S. H. Shi, C. N. Zhang, A. J. Liu, H. Li, K. S. Bi and Y. Jia, *Zhongguo Shiyang Fangjixue Zazhi*, 2013, **19**, 97.
170. J. W. Nam, S. J. Kim, A. R. Han, S. K. Lee and E. K. Seo, *J. Appl. Pharmacol.*, 2005, **13**, 263.
171. H. Matsuda, T. Morikawa, H. Managi and M. Yoshikawa, *Bioorg. Med. Chem. Lett.*, 2003, **13**, 3197.
172. L. Zhao, L. Y. Chen and J. Y. Liang, *Chin. J. Nat. Med.*, 2012, **10**, 370.
173. S. K. Roy, S. Pahwa, H. Nandanwar and S. M. Jachak, *Fitoterapia*, 2012, **83**, 1248.
174. T. Noro, T. Sekiya, M. Katoh, Y. Oda, T. Miyase, M. Kuroyanagi, A. Ueno and S. Fukushima, *Chem. Pharm. Bull.*, 1988, **36**, 244.
175. H. Itokawa, H. Morita, T. Sumitomo, N. Totsuka and K. Takeya, *Planta Med.*, 1987, **53**, 32.
176. H. Matsuda, Y. Pongpiriyadacha, T. Morikawa, M. Ochi and M. Yoshikawa, *Eur. J. Pharmacol.*, 2003, **471**, 59.
177. Y. Ye and B. Li, *J. Gen. Virol.*, 2006, **87**, 2047.
178. C. Latha, V. D. Shriram, S. S. Jahagirdar, P. K. Dhakephalkar and S. R. Rojatkar, *J. Ethnopharmacol.*, 2009, **123**, 522.
179. N. Watanabe, T. Kataoka, T. Tajika, M. Uramoto, J. Magae and K. Nagai, *Biosci., Biotechnol., Biochem.*, 1995, **59**, 1566.
180. P. Niyomkam, S. Kaewbumrung, S. Kaewpparat and P. Panichayupakaranant, *Pharm. Biol.*, 2010, **48**, 375.
181. H. J. Min, J. W. Nam, E. S. Yu, J. H. Hong, E. K. Seo and E. S. Hwang, *Int. Immunopharmacol.*, 2009, **9**, 448.
182. N. Hasima, L. I. L. Aun, M. N. Azmi, A. N. Aziz, E. Thirthagiri, H. Ibrahim and K. Awang, *Phytomedicine*, 2010, **17**, 935.
183. J. C. Hanish Singh, V. Alagarsamy, P. V. Diwan, S. Sathesh Kumar, J. C. Nisha and Y. Narsimha Reddy, *J. Ethnopharmacol.*, 2011, **138**, 85.
184. N. Sukhirun, W. Pluempanupat, V. Bullangpoti and O. Koul, *J. Econ. Entomol.*, 2011, **104**, 1534.
185. H. c. Wang, J. X. Li, H. Li, L. W. Yang, M. H. Gao and H. A. Chen, *Yaoxue Yanjiu*, 2013, **32**, 559.
186. W. Wang, S. Qi, H. Zhong and Q. Yao, *Shipin Yu Yaopin*, 2012, **14**, 88.
187. L. J. An, S. Guan, G. F. Shi, Y. M. Bao, Y. L. Duan and B. Jiang, *Food Chem. Toxicol.*, 2006, **44**, 436.
188. S. Guan, Y. M. Bao, B. Jiang and L. J. An, *Eur. J. Pharmacol.*, 2006, **538**, 73.
189. S. Guan, B. Jiang, Y. M. Bao and L. J. An, *Food Chem. Toxicol.*, 2006, **44**, 1659.
190. G. F. Shi, L. J. An, B. Jiang, S. Guan and Y. M. Bao, *Neurosci. Lett.*, 2006, **403**, 206.
191. Y. M. Liu, B. Jiang, Y. M. Bao and L. J. An, *Toxicol. in Vitro*, 2008, **22**, 430.
192. S. Guan, D. Ge, T.-Q. Liu, X.-H. Ma and Z.-F. Cui, *Toxicol. in Vitro*, 2009, **23**, 201.
193. H. Wang, T. Q. Liu, Y. X. Zhu, S. Guan, X. H. Ma and Z. F. Cui, *Molecular and Cellular Biochemistry*, 2009, **330**, 47.
194. S. Guan, X.-L. Zhang, D. Ge, T.-Q. Liu, X.-H. Ma and Z.-F. Cui, *Eur. J. Pharmacol.*, 2011,

670, 471.

195. X. Zhang, G. F. Shi, X. z. Liu, L. j. An and S. Guan, *Cell Biochem. Funct.*, 2011, **29**, 342.
196. H. M. Zhao, J. J. Xu and S. C. Yang, *Yunnan Nongye Daxue Xuebao*, 2014, **29**, 468.
197. N. An, J. Lin, S. Yang, Z. Zou and L. Xu, *Yaoxue Xuebao*, 2006, **41**, 233.
198. T. Fujita, H. Nishimura, K. Kaburagi and J. Mizutani, *Phytochemistry*, 1994, **36**, 23.
199. P. T. B. Tu and S. Tawata, *Molecules*, 2014, **19**, 16656.
200. M. G. Phan and T. S. Phan, *J. Chem.*, 2004, **42**, 376.
201. X. Wang, X. Yang and J. Li, *Zhongyaocai*, 2008, **31**, 853.
202. L. Di, Z. Wang, Z. Wang, N. Li and K. Wang, *Zhiwu Ziyuan Yu Huanjing Xuebao*, 2011, **20**, 94.
203. S. B. Jaju, N. H. Indurwade, D. M. Sakarkar, N. K. Fuloria, M. D. Ali and S. P. Basu, *Pharmacogn. Res.*, 2010, **2**, 264.
204. L. Zhao, J. Liang and W. Qu, *Chem. Nat. Compd.*, 2012, **48**, 836–838.
205. S. Qi, F. Ji and Q. Yao, *Shipin Yu Yaopin*, 2010, **12**, 39.
206. A. Liu, X. Zhao, H. Li, Z. Liu, B. Liu, X. Mao, L. Guo, K. Bi and Y. Jia, *Int. Immunopharmacol.*, 2014, **23**, 719.
